# Supplementary material
Source: PubMed Central journal article supplement (PMC4822619)
Supplement: pnas.1525085113.sapp.pdf [file pnas.1525085113.sapp.pdf]

## SI Appendix

**Table S1.** Budget and status of species with federal recovery plans categorized by proportion of budget realized. Overfunded species (green) are defined as those with budgets 2x or greater than those proposed. Underfunded species (red) are defined with those with budgets of 90% or less of budget proposed. Adequately funded species (orange) are those in between (proportional budget. between 0.9-2).

| Scientific Name                          | Taxon        | Year | Status | Proportion of budget received | Allocated Budget |
|------------------------------------------|--------------|------|--------|-------------------------------|------------------|
| <b>Overfunded recovery plans</b>         |              |      |        |                               |                  |
| <i>Bufo californicus</i>                 | Amphibian    | 1999 | -3     | 2.13                          | \$386,750        |
| <i>Phaeognathus hubrichti</i>            | Amphibian    | 1983 | -1     | 4.96                          | \$28,704         |
| <i>Plethodon nettingi</i>                | Amphibian    | 1991 | 1      | 2.04                          | \$69,426         |
| <i>Aphelocoma coerulescens</i>           | Bird         | 1990 | -11    | 52.53                         | \$33,820         |
| <i>Brachyramphus marmoratus</i>          | Bird         | 1997 | -9     | 2.13                          | \$2,036,214      |
| <i>Puffinus auricularis newelli</i>      | Bird         | 1983 | -7     | 2.66                          | \$202,020        |
| <i>Lanius ludovicianus mearnsi</i>       | Bird         | 1984 | -1     | 10.49                         | \$90,048         |
| <i>Sterna antillarum browni</i>          | Bird         | 1985 | -1     | 3.81                          | \$360,220        |
| <i>Buteo solitarius</i>                  | Bird         | 1984 | 0      | 3.87                          | \$32,107         |
| <i>Rallus longirostris yumanensis</i>    | Bird         | 2010 | 1      | 2.8                           | \$192,494        |
| <i>Sterna antillarum</i>                 | Bird         | 1990 | 3      | 12.77                         | \$204,107        |
| <i>Mycteria americana</i>                | Bird         | 1997 | 6      | 11.63                         | \$529,250        |
| <i>Meda fulgida</i>                      | Fish         | 1991 | -9     | 2.12                          | \$196,650        |
| <i>Poeciliopsis occidentalis</i>         | Fish         | 1998 | -6     | 2.39                          | \$160,732        |
| <i>Etheostoma fonticola</i>              | Fish         | 1996 | -5     | 2.06                          | \$60,241         |
| <i>Etheostoma scotti</i>                 | Fish         | 2000 | -3     | 6.68                          | \$52,466         |
| <i>Cyprinodon diabolis</i>               | Fish         | 1990 | -3     | 2.14                          | \$68,094         |
| <i>Salvelinus confluentus</i>            | Fish         | 2009 | 0      | 16.37                         | \$1,199,000      |
| <i>Etheostoma etowahae</i>               | Fish         | 2000 | 0      | 7.92                          | \$52,466         |
| <i>Cottus paulus</i>                     | Fish         | 1991 | 0      | 3.5                           | \$51,300         |
| <i>Xyrauchen texanus</i>                 | Fish         | 1990 | 0      | 2.47                          | \$2,019,615      |
| <i>Lepidomeda albivallis</i>             | Fish         | 1994 | 1      | 2.38                          | \$16,261         |
| <i>Erimonax monachus</i>                 | Fish         | 1983 | 2      | 3.64                          | \$31,980         |
| <i>Branchinecta lynchi</i>               | Invertebrate | 2013 | -6     | 6.97                          | \$219,688        |
| <i>Streptocephalus woottoni</i>          | Invertebrate | 1998 | -5     | 9.53                          | \$39,382         |
| <i>Branchinecta sandiegonensis</i>       | Invertebrate | 1998 | -3     | 13.58                         | \$39,382         |
| <i>Desmocerus californicus dimorphus</i> | Invertebrate | 1984 | -1     | 8.41                          | \$166,507        |
| <i>Leptoxis ampla</i>                    | Invertebrate | 2005 | -1     | 2.11                          | \$24,792         |
| <i>Valvata utahensis</i>                 | Invertebrate | 1995 | 1      | 4.15                          | \$71,176         |
| <i>Helminthoglypta walkeriana</i>        | Invertebrate | 1998 | 1      | 3.18                          | \$46,065         |
| <i>Lioplax cyclostomaformis</i>          | Invertebrate | 2005 | 1      | 2.15                          | \$24,792         |
| <i>Brachylagus idahoensis</i>            | Mammal       | 2012 | -5     | 3.5                           | \$111,137        |

|                                           |         |      |     |      |           |
|-------------------------------------------|---------|------|-----|------|-----------|
| <i>Peromyscus polionotus niveiventris</i> | Mammal  | 1993 | -4  | 4.17 | \$11,896  |
| <i>Peromyscus polionotus allophrys</i>    | Mammal  | 1987 | 1   | 6.02 | \$112,750 |
| <i>Peromyscus polionotus ammobates</i>    | Mammal  | 1987 | 5   | 2.87 | \$112,750 |
| <i>Sciurus niger cinereus</i>             | Mammal  | 1993 | 6   | 2.16 | \$147,905 |
| <i>Ursus americanus luteolus</i>          | Mammal  | 2009 | 7   | 9.9  | \$502,490 |
| <i>Myotis grisescens</i>                  | Mammal  | 1982 | 9   | 8.15 | \$82,743  |
| <i>Arctomecon humilis</i>                 | Plant   | 1985 | -10 | 2.68 | \$32,550  |
| <i>Zizania texana</i>                     | Plant   | 1996 | -8  | 2.04 | \$60,241  |
| <i>Navarretia fossalis</i>                | Plant   | 1998 | -5  | 6.65 | \$39,382  |
| <i>Pogogyne nudiuscula</i>                | Plant   | 1998 | -5  | 5.47 | \$39,382  |
| <i>Pogogyne abramsii</i>                  | Plant   | 1998 | -5  | 4.3  | \$39,382  |
| <i>Orcuttia californica</i>               | Plant   | 1998 | -5  | 3.92 | \$39,382  |
| <i>Portulaca sclerocarpa</i>              | Plant   | 1996 | -4  | 2.03 | \$33,265  |
| <i>Ceanothus roderickii</i>               | Plant   | 2002 | -3  | 2.06 | \$119,009 |
| <i>Eryngium aristulatum parishii</i>      | Plant   | 1998 | -2  | 7.32 | \$39,382  |
| <i>Silene hawaiiensis</i>                 | Plant   | 1996 | -1  | 2.41 | \$28,729  |
| <i>Zanthoxylum hawaiiense</i>             | Plant   | 1996 | -1  | 2.12 | \$33,265  |
| <i>Astragalus magdalenae peirsonii</i>    | Plant   | 2009 | 0   | 3.79 | \$62,566  |
| <i>Schwalbea americana</i>                | Plant   | 1995 | 0   | 2.32 | \$63,648  |
| <i>Iris lacustris</i>                     | Plant   | 2013 | 0   | 2.31 | \$42,092  |
| <i>Eriodictyon altissimum</i>             | Plant   | 1998 | 0   | 2.09 | \$46,065  |
| <i>Spiranthes diluvialis</i>              | Plant   | 1995 | 1   | 3.28 | \$221,340 |
| <i>Chorizanthe pungens pungens</i>        | Plant   | 1998 | 1   | 2.21 | \$32,204  |
| <i>Howellia aquatilis</i>                 | Plant   | 1996 | 6   | 2.07 | \$88,652  |
| <i>Gopherus polyphemus</i>                | Reptile | 1990 | -10 | 4.74 | \$256,913 |

#### **Adequately funded recovery plans**

|                                           |           |      |     |      |             |
|-------------------------------------------|-----------|------|-----|------|-------------|
| <i>Rana aurora draytonii</i>              | Amphibian | 2002 | -5  | 0.91 | \$2,588,127 |
| <i>Strix occidentalis caurina</i>         | Bird      | 2011 | -10 | 1.91 | \$4,448,500 |
| <i>Dendroica chrysoparia</i>              | Bird      | 1992 | -9  | 1.44 | \$1,315,716 |
| <i>Aerodramus vanikorensis bartschi</i>   | Bird      | 1991 | 0   | 1.16 | \$133,014   |
| <i>Falco femoralis septentrionalis</i>    | Bird      | 1990 | 2   | 1.12 | \$336,420   |
| <i>Agelaius xanthomus</i>                 | Bird      | 1996 | 8   | 0.91 | \$241,733   |
| <i>Haliaeetus leucocephalus</i>           | Bird      | 1988 | 9   | 0.99 | \$9,812,767 |
| <i>Tiaroga cobitis</i>                    | Fish      | 1991 | -9  | 1.88 | \$196,650   |
| <i>Lepidomeda vittata</i>                 | Fish      | 1998 | -8  | 1.14 | \$382,128   |
| <i>Plagopterus argentissimus</i>          | Fish      | 1995 | -8  | 1.12 | \$293,250   |
| <i>Oncorhynchus clarki henshawi</i>       | Fish      | 1995 | -6  | 1.8  | \$1,081,777 |
| <i>Acipenser transmontanus</i>            | Fish      | 1999 | -6  | 1.65 | \$2,087,680 |
| <i>Gasterosteus aculeatus williamsoni</i> | Fish      | 1985 | -5  | 1.29 | \$217,723   |
| <i>Chasmistes brevirostris</i>            | Fish      | 2013 | -4  | 1.35 | \$1,296,930 |
| <i>Lepidomeda mollispinis pratensis</i>   | Fish      | 1994 | -3  | 1.79 | \$23,671    |
| <i>Gambusia nobilis</i>                   | Fish      | 1985 | -2  | 1.91 | \$30,018    |
| <i>Deltistes luxatus</i>                  | Fish      | 2013 | -2  | 1.36 | \$1,296,930 |

|                                            |              |      |     |      |             |
|--------------------------------------------|--------------|------|-----|------|-------------|
| <i>Gila boraxobius</i>                     | Fish         | 1987 | -1  | 1.9  | \$23,575    |
| <i>Gila cypha</i>                          | Fish         | 1990 | -1  | 1.38 | \$2,019,615 |
| <i>Oncorhynchus clarki seleniris</i>       | Fish         | 2004 | -1  | 1.29 | \$68,689    |
| <i>Moapa coriacea</i>                      | Fish         | 1996 | -1  | 1.27 | \$156,140   |
| <i>Cyprinella monacha</i>                  | Fish         | 1983 | 0   | 1.34 | \$28,860    |
| <i>Acipenser oxyrinchus desotoi</i>        | Fish         | 1995 | 0   | 1.27 | \$443,858   |
| <i>Oregonichthys crameri</i>               | Fish         | 1998 | 0   | 1.02 | \$433,648   |
| <i>Percina rex</i>                         | Fish         | 1992 | 1   | 1.64 | \$93,458    |
| <i>Notropis simus pecosensis</i>           | Fish         | 1992 | 1   | 1.56 | \$375,741   |
| <i>Cyprinodon macularius</i>               | Fish         | 1993 | 1   | 1.2  | \$136,528   |
| <i>Amblyopsis rosae</i>                    | Fish         | 1986 | 2   | 1.97 | \$47,925    |
| <i>Ptychocheilus lucius</i>                | Fish         | 1990 | 2   | 1.92 | \$2,019,615 |
| <i>Eucyclogobius newberryi</i>             | Fish         | 2005 | 2   | 1.22 | \$235,620   |
| <i>Cicindela dorsalis dorsalis</i>         | Invertebrate | 1994 | -5  | 1.33 | \$116,703   |
| <i>Medionidus acutissimus</i>              | Invertebrate | 2000 | -5  | 1.06 | \$52,466    |
| <i>Alasmidonta heterodon</i>               | Invertebrate | 1993 | -4  | 1.76 | \$156,331   |
| <i>Physa natricina</i>                     | Invertebrate | 1995 | -4  | 1.18 | \$71,176    |
| <i>Alasmidonta raveneliana</i>             | Invertebrate | 1996 | -3  | 1.84 | \$56,845    |
| <i>Triodopsis platysayoides</i>            | Invertebrate | 1983 | -3  | 0.99 | \$43,524    |
| <i>Pyrgus ruralis lagunae</i>              | Invertebrate | 2010 | -2  | 1.91 | \$45,053    |
| <i>Taylorconcha serpenticola</i>           | Invertebrate | 1995 | -1  | 1.34 | \$71,176    |
| <i>Icaricia icarioides missionensis</i>    | Invertebrate | 1984 | 0   | 1.79 | \$52,453    |
| <i>Nicrophorus americanus</i>              | Invertebrate | 1991 | 0   | 1.19 | \$312,645   |
| <i>Orconectes shoupi</i>                   | Invertebrate | 1989 | 0   | 1.14 | \$46,373    |
| <i>Fontelicella idahoensis</i>             | Invertebrate | 1995 | 1   | 0.92 | \$71,176    |
| <i>Vulpes macrotis mutica</i>              | Mammal       | 1998 | -11 | 0.91 | \$1,303,380 |
| <i>Dipodomys stephensi</i>                 | Mammal       | 1997 | -1  | 0.91 | \$348,000   |
| <i>Peromyscus polionotus phasma</i>        | Mammal       | 1993 | 1   | 1.59 | \$11,896    |
| <i>Enhydra lutris nereis</i>               | Mammal       | 2003 | 2   | 1    | \$648,951   |
| <i>Corynorhinus townsendii virginianus</i> | Mammal       | 1984 | 8   | 1.12 | \$127,680   |
| <i>Baptisia arachnifera</i>                | Plant        | 1984 | -9  | 1.82 | \$12,320    |
| <i>Erigeron parishii</i>                   | Plant        | 1997 | -7  | 1.52 | \$22,620    |
| <i>Pediocactus winkleri</i>                | Plant        | 1995 | -7  | 0.9  | \$20,400    |
| <i>Thelypodium stenopetalum</i>            | Plant        | 1998 | -7  | 0.9  | \$33,748    |
| <i>Lindera melissifolia</i>                | Plant        | 1993 | -6  | 1.99 | \$142,646   |
| <i>Eriogonum ovalifolium vineum</i>        | Plant        | 1997 | -6  | 1.56 | \$22,620    |
| <i>Lesquerella kingii bernardina</i>       | Plant        | 1997 | -6  | 1.53 | \$22,620    |
| <i>Oxytheca parishii goodmaniana</i>       | Plant        | 1997 | -6  | 1.51 | \$22,620    |
| <i>Amaranthus pumilus</i>                  | Plant        | 1996 | -6  | 1.49 | \$162,800   |
| <i>Astragalus albens</i>                   | Plant        | 1997 | -6  | 1.24 | \$22,620    |
| <i>Tetramolopium arenarium</i>             | Plant        | 1996 | -5  | 1.87 | \$33,265    |
| <i>Echinacea laevigata</i>                 | Plant        | 1995 | -5  | 1.3  | \$140,000   |
| <i>Cyanea koolauensis</i>                  | Plant        | 1998 | -5  | 1.03 | \$48,051    |
| <i>Erysimum menziesii</i>                  | Plant        | 1998 | -4  | 1.76 | \$32,204    |

|                                      |         |      |     |      |           |
|--------------------------------------|---------|------|-----|------|-----------|
| <i>Helonias bullata</i>              | Plant   | 1991 | -4  | 1.6  | \$78,831  |
| <i>Coryphantha sneedii sneedii</i>   | Plant   | 1986 | -4  | 1.56 | \$20,058  |
| <i>Isoetes melanospora</i>           | Plant   | 1993 | -4  | 1.52 | \$8,944   |
| <i>Chorizanthe robusta</i>           | Plant   | 1998 | -4  | 1.23 | \$33,348  |
| <i>Lobelia oahuensis</i>             | Plant   | 1998 | -4  | 0.92 | \$48,051  |
| <i>Viola oahuensis</i>               | Plant   | 1998 | -4  | 0.91 | \$48,051  |
| <i>Calystegia stebbinsii</i>         | Plant   | 2002 | -3  | 1.8  | \$119,009 |
| <i>Erigeron decumbens decumbens</i>  | Plant   | 2010 | -3  | 1.72 | \$306,421 |
| <i>Trillium reliquum</i>             | Plant   | 1991 | -3  | 1.16 | \$20,691  |
| <i>Spiraea virginiana</i>            | Plant   | 1992 | -3  | 1.07 | \$88,921  |
| <i>Gardenia mannii</i>               | Plant   | 1998 | -3  | 1.02 | \$48,051  |
| <i>Fritillaria gentneri</i>          | Plant   | 2003 | -3  | 0.92 | \$248,126 |
| <i>Amphianthus pusillus</i>          | Plant   | 1993 | -3  | 0.92 | \$8,944   |
| <i>Clermontia pyrularia</i>          | Plant   | 1996 | -2  | 1.19 | \$33,265  |
| <i>Euphorbia telephioides</i>        | Plant   | 1994 | -2  | 1.17 | \$15,308  |
| <i>Cyanea acuminata</i>              | Plant   | 1998 | -2  | 0.99 | \$48,051  |
| <i>Neraudia ovata</i>                | Plant   | 1998 | -2  | 0.95 | \$77,996  |
| <i>Nothoctrum breviflorum</i>        | Plant   | 1996 | -1  | 1.72 | \$33,265  |
| <i>Senecio layneae</i>               | Plant   | 2002 | -1  | 1.6  | \$119,009 |
| <i>Pinguicula ionantha</i>           | Plant   | 1994 | -1  | 1.56 | \$15,308  |
| <i>Gilia tenuiflora arenaria</i>     | Plant   | 1998 | -1  | 1.29 | \$32,204  |
| <i>Galium californicum sierrae</i>   | Plant   | 2002 | -1  | 1.2  | \$119,009 |
| <i>Castilleja levisecta</i>          | Plant   | 2000 | -1  | 1.14 | \$278,438 |
| <i>Macbridea alba</i>                | Plant   | 1994 | -1  | 0.99 | \$15,308  |
| <i>Cyanea stictophylla</i>           | Plant   | 1996 | -1  | 0.97 | \$33,265  |
| <i>Layia carnosa</i>                 | Plant   | 1998 | 0   | 1.75 | \$32,204  |
| <i>Hackelia venusta</i>              | Plant   | 2007 | 0   | 1.7  | \$16,352  |
| <i>Piperia yadonii</i>               | Plant   | 2004 | 0   | 1.45 | \$33,723  |
| <i>Lysimachia asperulaefolia</i>     | Plant   | 1995 | 0   | 1.3  | \$84,167  |
| <i>Delissea subcordata</i>           | Plant   | 1998 | 0   | 0.9  | \$48,051  |
| <i>Scutellaria montana</i>           | Plant   | 1996 | 1   | 1.11 | \$27,109  |
| <i>Isoetes louisianensis</i>         | Plant   | 1996 | 3   | 1.37 | \$36,507  |
| <i>Cyrtandra dentata</i>             | Plant   | 1998 | 3   | 0.93 | \$48,051  |
| <i>Harperocallis flava</i>           | Plant   | 1983 | 8   | 1.88 | \$38,220  |
| <i>Isotria medeoloides</i>           | Plant   | 1992 | 8   | 1.02 | \$78,269  |
| <i>Uma inornata</i>                  | Reptile | 1985 | -11 | 1.68 | \$180,833 |
| <i>Nerodia clarkii taeniata</i>      | Reptile | 1993 | -5  | 1.24 | \$48,944  |
| <i>Clemmys muhlenbergii</i>          | Reptile | 2001 | -4  | 1.28 | \$702,680 |
| <i>Pseudemys alabamensis</i>         | Reptile | 1980 | 0   | 1.58 | \$21,131  |
| <i>Lepidochelys olivacea</i>         | Reptile | 1998 | 2   | 1.2  | \$890,175 |
| <i>Pseudemys rubriventris bangsi</i> | Reptile | 1994 | 6   | 1.53 | \$56,913  |

**Underfunded recovery plans**

|                                        |           |      |    |      |           |
|----------------------------------------|-----------|------|----|------|-----------|
| <i>Ambystoma macrodactylum croceum</i> | Amphibian | 1999 | -7 | 0.35 | \$480,347 |
|----------------------------------------|-----------|------|----|------|-----------|

|                                         |           |      |     |      |              |
|-----------------------------------------|-----------|------|-----|------|--------------|
| <i>Bufo houstonensis</i>                | Amphibian | 1984 | -6  | 0.26 | \$479,360    |
| <i>Eurycea nana</i>                     | Amphibian | 1996 | -5  | 0.6  | \$60,241     |
| <i>Typhlomolge rathbuni</i>             | Amphibian | 1996 | -4  | 0.7  | \$60,241     |
| <i>Rana capito sevosa</i>               | Amphibian | 2010 | -3  | 0.65 | \$359,700    |
| <i>Bufo baxteri</i>                     | Amphibian | 2014 | -3  | 0.41 | \$284,000    |
| <i>Eurycea sosorum</i>                  | Amphibian | 2005 | -3  | 0.3  | \$744,345    |
| <i>Eleutherodactylus jasperi</i>        | Amphibian | 1984 | -3  | 0.02 | \$227,733    |
| <i>Plethodon shenandoah</i>             | Amphibian | 1994 | -2  | 0.22 | \$81,378     |
| <i>Rana chiricahuensis</i>              | Amphibian | 2007 | -1  | 0.47 | \$764,512    |
| <i>Ambystoma tigrinum stebbinsi</i>     | Amphibian | 2002 | -1  | 0.17 | \$262,128    |
| <i>Batrachoseps aridus</i>              | Amphibian | 1982 | 0   | 0.2  | \$76,317     |
| <i>Peltophryne lemur</i>                | Amphibian | 1992 | 0   | 0.14 | \$118,524    |
| <i>Eleutherodactylus cooki</i>          | Amphibian | 2004 | 0   | 0.07 | \$208,116    |
| <i>Corvus kubaryi</i>                   | Bird      | 2006 | -11 | 0.02 | \$15,344,944 |
| <i>Corvus hawaiiensis</i>               | Bird      | 2009 | -8  | 0.1  | \$3,134,840  |
| <i>Melamprosops phaeosoma</i>           | Bird      | 2006 | -8  | 0.01 | \$5,041,832  |
| <i>Halcyon cinnamomina cinnamomina</i>  | Bird      | 2008 | -8  | 0.01 | \$8,467,200  |
| <i>Ammodramus savannarum floridanus</i> | Bird      | 1989 | -7  | 0.2  | \$5,627,059  |
| <i>Tympanuchus cupido attwateri</i>     | Bird      | 2010 | -7  | 0.04 | \$8,840,118  |
| <i>Hemignathus lucidus</i>              | Bird      | 2006 | -7  | 0.01 | \$5,041,832  |
| <i>Rallus longirostris obsoletus</i>    | Bird      | 2014 | -6  | 0.1  | \$5,183,564  |
| <i>Charadrius melodus</i>               | Bird      | 1996 | -5  | 0.89 | \$4,777,440  |
| <i>Rallus owstoni</i>                   | Bird      | 1990 | -5  | 0.7  | \$331,021    |
| <i>Acrocephalus luscini</i>             | Bird      | 1998 | -5  | 0.13 | \$395,633    |
| <i>Chasiempis sandwichensis ibidis</i>  | Bird      | 2006 | -5  | 0.03 | \$5,041,832  |
| <i>Myadestes myadestinus</i>            | Bird      | 2006 | -5  | 0    | \$5,041,832  |
| <i>Rostrhamus sociabilis plumbeus</i>   | Bird      | 1989 | -4  | 0.12 | \$5,627,059  |
| <i>Vireo atricapilla</i>                | Bird      | 1991 | -4  | 0.05 | \$27,996,690 |
| <i>Myadestes lanaiensis rutha</i>       | Bird      | 2006 | -4  | 0    | \$5,041,832  |
| <i>Amphispiza belli clementeae</i>      | Bird      | 1984 | -3  | 0.75 | \$90,048     |
| <i>Charadrius alexandrinus nivosus</i>  | Bird      | 2007 | -3  | 0.44 | \$4,198,488  |
| <i>Ammodramus maritimus mirabilis</i>   | Bird      | 1989 | -3  | 0.15 | \$5,627,059  |
| <i>Hemignathus munroi</i>               | Bird      | 2006 | -3  | 0.02 | \$5,041,832  |
| <i>Psittirostra psittacea</i>           | Bird      | 2006 | -3  | 0.01 | \$5,041,832  |
| <i>Loxops coccineus ochraceus</i>       | Bird      | 2006 | -3  | 0.01 | \$5,041,832  |
| <i>Moho braccatus</i>                   | Bird      | 2006 | -3  | 0    | \$5,041,832  |
| <i>Paroreomyza flammea</i>              | Bird      | 2006 | -3  | 0    | \$5,041,832  |
| <i>Anas wyvilliana</i>                  | Bird      | 2011 | -2  | 0.61 | \$644,333    |
| <i>Sterna dougallii dougallii</i>       | Bird      | 1998 | -2  | 0.28 | \$1,088,230  |
| <i>Telespyza cantans</i>                | Bird      | 1984 | -2  | 0.24 | \$69,067     |
| <i>Somateria fischeri</i>               | Bird      | 1996 | -2  | 0.24 | \$2,366,816  |
| <i>Accipiter striatus venator</i>       | Bird      | 1997 | -2  | 0.19 | \$163,367    |
| <i>Loxioides bailleui</i>               | Bird      | 2006 | -2  | 0.14 | \$5,041,832  |
| <i>Buteo platypterus brunnescens</i>    | Bird      | 1997 | -2  | 0.11 | \$163,367    |

|                                            |      |      |    |      |              |
|--------------------------------------------|------|------|----|------|--------------|
| <i>Rallus longirostris levipes</i>         | Bird | 1985 | -2 | 0.1  | \$3,126,355  |
| <i>Zosterops rotensis</i>                  | Bird | 2007 | -2 | 0.02 | \$2,749,824  |
| <i>Paroreomyza maculata</i>                | Bird | 2006 | -2 | 0    | \$5,041,832  |
| <i>Amazona vittata</i>                     | Bird | 2009 | -1 | 0.86 | \$1,234,467  |
| <i>Polysticta stelleri</i>                 | Bird | 2002 | -1 | 0.62 | \$1,361,982  |
| <i>Empidonax traillii extimus</i>          | Bird | 2002 | -1 | 0.45 | \$15,475,614 |
| <i>Branta sandvicensis</i>                 | Bird | 2004 | -1 | 0.19 | \$2,449,791  |
| <i>Megapodius laperouse</i>                | Bird | 1998 | -1 | 0.17 | \$350,541    |
| <i>Anas laysanensis</i>                    | Bird | 2010 | -1 | 0.03 | \$1,990,013  |
| <i>Oreomystis bairdi</i>                   | Bird | 2006 | -1 | 0.01 | \$5,041,832  |
| <i>Myadestes palmeri</i>                   | Bird | 2006 | -1 | 0.01 | \$5,041,832  |
| <i>Himantopus mexicanus knudseni</i>       | Bird | 2011 | 0  | 0.78 | \$644,333    |
| <i>Pterodroma phaeopygia sandwichensis</i> | Bird | 1983 | 0  | 0.62 | \$202,020    |
| <i>Strix occidentalis lucida</i>           | Bird | 2012 | 0  | 0.61 | \$3,777,628  |
| <i>Fulica americana alai</i>               | Bird | 2011 | 0  | 0.52 | \$644,333    |
| <i>Gallinula chloropus sandvicensis</i>    | Bird | 2011 | 0  | 0.48 | \$644,333    |
| <i>Gallinula chloropus guami</i>           | Bird | 1991 | 0  | 0.24 | \$431,897    |
| <i>Polyborus plancus audubonii</i>         | Bird | 1989 | 0  | 0.21 | \$5,627,059  |
| <i>Telespyza ultima</i>                    | Bird | 1984 | 0  | 0.21 | \$69,067     |
| <i>Acrocephalus familiaris kingi</i>       | Bird | 2008 | 0  | 0.09 | \$201,312    |
| <i>Campephilus principalis</i>             | Bird | 2010 | 0  | 0.08 | \$6,723,847  |
| <i>Loxops coccineus coccineus</i>          | Bird | 2006 | 0  | 0.05 | \$5,041,832  |
| <i>Oreomystis mana</i>                     | Bird | 2006 | 0  | 0.03 | \$5,041,832  |
| <i>Caprimulgus noctitherus</i>             | Bird | 1984 | 0  | 0.02 | \$541,333    |
| <i>Pseudonestor xanthophrys</i>            | Bird | 2006 | 0  | 0.02 | \$5,041,832  |
| <i>Palmeria dolei</i>                      | Bird | 2006 | 0  | 0.01 | \$5,041,832  |
| <i>Hemignathus procerus</i>                | Bird | 2006 | 0  | 0    | \$5,041,832  |
| <i>Columba inornata wetmorei</i>           | Bird | 1982 | 1  | 0.19 | \$350,253    |
| <i>Grus canadensis pulla</i>               | Bird | 1991 | 2  | 0.32 | \$1,425,000  |
| <i>Colinus virginianus ridgwayi</i>        | Bird | 1994 | 2  | 0.2  | \$1,762,875  |
| <i>Pipilo crissalis eremophilus</i>        | Bird | 1998 | 3  | 0.52 | \$69,850     |
| <i>Phoebastria albatrus</i>                | Bird | 2009 | 6  | 0.26 | \$1,004,326  |
| <i>Grus americana</i>                      | Bird | 2007 | 7  | 0.67 | \$4,866,207  |
| <i>Dendroica kirtlandii</i>                | Bird | 2009 | 8  | 0.09 | \$6,661,608  |
| <i>Vireo bellii pusillus</i>               | Bird | 1998 | 9  | 0.86 | \$2,402,972  |
| <i>Gymnogyps californianus</i>             | Bird | 1996 | 9  | 0.43 | \$2,663,723  |
| <i>Erimystax cahni</i>                     | Fish | 1983 | -8 | 0.36 | \$34,710     |
| <i>Cyprinodon elegans</i>                  | Fish | 1981 | -7 | 0.89 | \$54,613     |
| <i>Noturus placidus</i>                    | Fish | 1991 | -7 | 0.77 | \$100,646    |
| <i>Gila robusta jordani</i>                | Fish | 1998 | -6 | 0.87 | \$54,340     |
| <i>Ictalurus pricei</i>                    | Fish | 1995 | -5 | 0.23 | \$136,476    |
| <i>Scaphirhynchus albus</i>                | Fish | 2013 | -5 | 0.2  | \$51,034,680 |
| <i>Notropis girardi</i>                    | Fish | 2009 | -5 | 0.07 | \$1,324,786  |
| <i>Noturus flavipinnis</i>                 | Fish | 1983 | -4 | 0.82 | \$35,880     |

|                                         |      |      |    |      |              |
|-----------------------------------------|------|------|----|------|--------------|
| <i>Percina pantherina</i>               | Fish | 1993 | -4 | 0.33 | \$206,724    |
| <i>Chasmistes liorus</i>                | Fish | 1999 | -4 | 0.22 | \$1,707,317  |
| <i>Etheostoma boschungii</i>            | Fish | 1984 | -4 | 0.22 | \$82,955     |
| <i>Cyprinella formosa</i>               | Fish | 1995 | -4 | 0.19 | \$136,476    |
| <i>Rhinichthys osculus nevadensis</i>   | Fish | 1990 | -3 | 0.78 | \$68,094     |
| <i>Cyprinella caerulea</i>              | Fish | 1995 | -3 | 0.49 | \$114,750    |
| <i>Gila bicolor mohavensis</i>          | Fish | 1984 | -3 | 0.43 | \$146,720    |
| <i>Hypomesus transpacificus</i>         | Fish | 1996 | -3 | 0.33 | \$4,654,600  |
| <i>Hybognathus amarus</i>               | Fish | 2010 | -3 | 0.3  | \$15,365,730 |
| <i>Empetrichthys latos</i>              | Fish | 1980 | -3 | 0.02 | \$1,175,865  |
| <i>Catostomus warnerensis</i>           | Fish | 1998 | -2 | 0.85 | \$117,765    |
| <i>Crenichthys nevadae</i>              | Fish | 1997 | -2 | 0.64 | \$118,071    |
| <i>Acipenser medirostris</i>            | Fish | 1995 | -2 | 0.64 | \$4,811,850  |
| <i>Cyprinodon radiosus</i>              | Fish | 1998 | -2 | 0.23 | \$130,216    |
| <i>Dionda diaboli</i>                   | Fish | 2005 | -2 | 0.23 | \$347,480    |
| <i>Gila elegans</i>                     | Fish | 1990 | -1 | 0.88 | \$2,187,917  |
| <i>Cyprinodon bovinus</i>               | Fish | 1985 | -1 | 0.76 | \$27,487     |
| <i>Cyprinodon nevadensis pectoralis</i> | Fish | 1990 | -1 | 0.66 | \$68,094     |
| <i>Gila seminuda</i>                    | Fish | 1995 | -1 | 0.61 | \$439,875    |
| <i>Percina aurolineata</i>              | Fish | 2000 | -1 | 0.49 | \$52,466     |
| <i>Salmo salar</i>                      | Fish | 2005 | -1 | 0.37 | \$14,518,000 |
| <i>Crenichthys baileyi grandis</i>      | Fish | 1998 | -1 | 0.36 | \$54,340     |
| <i>Gila ditaenia</i>                    | Fish | 1992 | -1 | 0.35 | \$89,142     |
| <i>Etheostoma nianguae</i>              | Fish | 1989 | -1 | 0.33 | \$352,187    |
| <i>Eremichthys acros</i>                | Fish | 1997 | -1 | 0.31 | \$180,163    |
| <i>Gila bicolor snyderi</i>             | Fish | 1998 | -1 | 0.29 | \$130,216    |
| <i>Rhinichthys osculus thermalis</i>    | Fish | 2012 | -1 | 0.02 | \$390,380    |
| <i>Oncorhynchus gilae</i>               | Fish | 2003 | 0  | 0.8  | \$360,553    |
| <i>Percina antesella</i>                | Fish | 1986 | 0  | 0.79 | \$53,605     |
| <i>Etheostoma wapiti</i>                | Fish | 1989 | 0  | 0.69 | \$112,487    |
| <i>Acipenser brevirostrum</i>           | Fish | 1998 | 0  | 0.64 | \$1,647,360  |
| <i>Etheostoma sp.</i>                   | Fish | 1997 | 0  | 0.59 | \$54,045     |
| <i>Crenichthys baileyi baileyi</i>      | Fish | 1998 | 0  | 0.55 | \$54,340     |
| <i>Scaphirhynchus suttkusi</i>          | Fish | 2013 | 0  | 0.54 | \$234,600    |
| <i>Phoxinus cumberlandensis</i>         | Fish | 1988 | 0  | 0.47 | \$111,962    |
| <i>Notropis mekistocholas</i>           | Fish | 1988 | 0  | 0.34 | \$101,455    |
| <i>Etheostoma rubrum</i>                | Fish | 1990 | 0  | 0.29 | \$19,192     |
| <i>Notropis albizonatus</i>             | Fish | 1997 | 0  | 0.25 | \$50,091     |
| <i>Percina tanasi</i>                   | Fish | 1983 | 0  | 0.25 | \$65,910     |
| <i>Etheostoma chienense</i>             | Fish | 1994 | 0  | 0.25 | \$51,382     |
| <i>Gambusia gagei</i>                   | Fish | 1984 | 0  | 0.22 | \$85,867     |
| <i>Rhinichthys osculus oligoporus</i>   | Fish | 1998 | 0  | 0.19 | \$84,084     |
| <i>Rhinichthys osculus lethoporus</i>   | Fish | 1998 | 0  | 0.19 | \$84,084     |
| <i>Gambusia georgei</i>                 | Fish | 1996 | 0  | 0.17 | \$60,241     |

|                                            |              |      |     |      |             |
|--------------------------------------------|--------------|------|-----|------|-------------|
| <i>Pristis pectinata</i>                   | Fish         | 2009 | 0   | 0.16 | \$3,144,650 |
| <i>Pogonichthys macrolepidotus</i>         | Fish         | 1995 | 0   | 0.15 | \$4,811,850 |
| <i>Gambusia heterochir</i>                 | Fish         | 1982 | 0   | 0.14 | \$79,530    |
| <i>Menidia extensa</i>                     | Fish         | 1993 | 0   | 0.11 | \$48,739    |
| <i>Noturus stanauli</i>                    | Fish         | 1994 | 0   | 0.08 | \$89,205    |
| <i>Etheostoma chermocki</i>                | Fish         | 2007 | 0   | 0.06 | \$183,884   |
| <i>Speoplatyrhinus poulsoni</i>            | Fish         | 1990 | 0   | 0.03 | \$278,273   |
| <i>Etheostoma okaloosae</i>                | Fish         | 1998 | 1   | 0.48 | \$1,067,066 |
| <i>Percina jenkinsi</i>                    | Fish         | 1986 | 1   | 0.48 | \$53,605    |
| <i>Gila purpurea</i>                       | Fish         | 1995 | 1   | 0.28 | \$136,476   |
| <i>Notropis cahabae</i>                    | Fish         | 1992 | 2   | 0.29 | \$224,100   |
| <i>Etheostoma percnurum</i>                | Fish         | 1994 | 3   | 0.28 | \$101,336   |
| <i>Cyprinodon nevadensis mionectes</i>     | Fish         | 1990 | 4   | 0.77 | \$68,094    |
| <i>Noturus baileyi</i>                     | Fish         | 1985 | 4   | 0.27 | \$73,418    |
| <i>Oncorhynchus clarki stomias</i>         | Fish         | 1998 | 4   | 0.22 | \$858,000   |
| <i>Gila nigrescens</i>                     | Fish         | 1986 | 4   | 0.17 | \$124,960   |
| <i>Oncorhynchus apache</i>                 | Fish         | 2009 | 5   | 0.43 | \$781,167   |
| <i>Chasmistes cujus</i>                    | Fish         | 1992 | 8   | 0.87 | \$965,498   |
| <i>Epioblasma obliquata obliquata</i>      | Invertebrate | 1992 | -10 | 0.38 | \$69,267    |
| <i>Arkansia wheeleri</i>                   | Invertebrate | 2004 | -10 | 0.13 | \$507,053   |
| <i>Pegias fabula</i>                       | Invertebrate | 1989 | -9  | 0.67 | \$116,873   |
| <i>Epioblasma obliquata perobliqua</i>     | Invertebrate | 1990 | -9  | 0.22 | \$124,155   |
| <i>Pacifastacus fortis</i>                 | Invertebrate | 1998 | -8  | 0.07 | \$1,287,000 |
| <i>Achatinella spp.</i>                    | Invertebrate | 1992 | -7  | 0.69 | \$395,782   |
| <i>Obovaria retusa</i>                     | Invertebrate | 1991 | -7  | 0.38 | \$90,785    |
| <i>Lampsilis higginsii</i>                 | Invertebrate | 2004 | -7  | 0.32 | \$1,558,000 |
| <i>Villosa perpurpurea</i>                 | Invertebrate | 2004 | -7  | 0.27 | \$185,755   |
| <i>Cyprogenia stegaria</i>                 | Invertebrate | 2008 | -7  | 0.19 | \$572,400   |
| <i>Pleurobema taitianum</i>                | Invertebrate | 1989 | -7  | 0.18 | \$84,788    |
| <i>Lasmigona decorata</i>                  | Invertebrate | 2009 | -7  | 0.13 | \$1,445,340 |
| <i>Elliptio steinstansana</i>              | Invertebrate | 2009 | -7  | 0.02 | \$4,169,250 |
| <i>Lepidurus packardi</i>                  | Invertebrate | 2006 | -6  | 0.57 | \$2,084,542 |
| <i>Medionidus parvulus</i>                 | Invertebrate | 2000 | -6  | 0.34 | \$52,466    |
| <i>Pyrgulopsis bruneauensis</i>            | Invertebrate | 2002 | -6  | 0.11 | \$967,500   |
| <i>Euphydryas editha bayensis</i>          | Invertebrate | 1998 | -6  | 0.01 | \$4,415,840 |
| <i>Polyphylla barbata</i>                  | Invertebrate | 1998 | -5  | 0.72 | \$33,348    |
| <i>Cicindela puritana</i>                  | Invertebrate | 1993 | -5  | 0.61 | \$149,462   |
| <i>Lampsilis perovalis</i>                 | Invertebrate | 2000 | -5  | 0.52 | \$52,466    |
| <i>Rhaphiomidas terminatus abdominalis</i> | Invertebrate | 1997 | -5  | 0.48 | \$232,435   |
| <i>Texella reyesi</i>                      | Invertebrate | 1994 | -5  | 0.37 | \$182,419   |
| <i>Pleurobema clava</i>                    | Invertebrate | 1994 | -5  | 0.34 | \$473,617   |
| <i>Speyeria zerene hippolyta</i>           | Invertebrate | 2001 | -5  | 0.33 | \$1,023,000 |
| <i>Epioblasma brevidens</i>                | Invertebrate | 2004 | -5  | 0.29 | \$185,755   |
| <i>Pleurobema furvum</i>                   | Invertebrate | 2000 | -5  | 0.25 | \$52,466    |



|                                               |              |      |    |      |              |
|-----------------------------------------------|--------------|------|----|------|--------------|
| <i>Epioblasma torulosa rangiana</i>           | Invertebrate | 1994 | -5 | 0.22 | \$473,617    |
| <i>Euphilotes enoptes smithi</i>              | Invertebrate | 1984 | -5 | 0.16 | \$243,413    |
| <i>Epioblasma penita</i>                      | Invertebrate | 1989 | -5 | 0.11 | \$84,788     |
| <i>Succinea chittenangoensis</i>              | Invertebrate | 2006 | -5 | 0.08 | \$87,193     |
| <i>Quadrula stapes</i>                        | Invertebrate | 1989 | -5 | 0.05 | \$84,788     |
| <i>Pleurobema marshalli</i>                   | Invertebrate | 1989 | -5 | 0.05 | \$84,788     |
| <i>Leptodea leptodon</i>                      | Invertebrate | 2010 | -5 | 0.04 | \$2,934,825  |
| <i>Gammarus acherondytes</i>                  | Invertebrate | 2002 | -5 | 0.02 | \$777,870    |
| <i>Cicurina baronia</i>                       | Invertebrate | 2011 | -5 | 0.01 | \$1,580,600  |
| <i>Pleurobema decisum</i>                     | Invertebrate | 2000 | -4 | 0.85 | \$52,466     |
| <i>Glaucopsyche lygdamus palosverdesensis</i> | Invertebrate | 1984 | -4 | 0.85 | \$128,427    |
| <i>Neonympha mitchellii francisci</i>         | Invertebrate | 1996 | -4 | 0.7  | \$137,640    |
| <i>Lampsilis altilis</i>                      | Invertebrate | 2000 | -4 | 0.65 | \$52,466     |
| <i>Trimerotropis infantilis</i>               | Invertebrate | 1998 | -4 | 0.53 | \$33,348     |
| <i>Cicindela ohlone</i>                       | Invertebrate | 1998 | -4 | 0.53 | \$33,348     |
| <i>Epioblasma capsaeformis</i>                | Invertebrate | 2004 | -4 | 0.38 | \$185,755    |
| <i>Epioblasma metastrata</i>                  | Invertebrate | 2000 | -4 | 0.33 | \$52,466     |
| <i>Pleurobema georgianum</i>                  | Invertebrate | 2000 | -4 | 0.3  | \$52,466     |
| <i>Epioblasma othcaloogensis</i>              | Invertebrate | 2000 | -4 | 0.26 | \$52,466     |
| <i>Somatochlora hineana</i>                   | Invertebrate | 2001 | -4 | 0.21 | \$868,758    |
| <i>Quadrula cylindrica strigillata</i>        | Invertebrate | 2004 | -4 | 0.2  | \$185,755    |
| <i>Stygoparnus comalensis</i>                 | Invertebrate | 1996 | -4 | 0.11 | \$200,152    |
| <i>Pleurobema gibberum</i>                    | Invertebrate | 1992 | -4 | 0.07 | \$93,337     |
| <i>Pleurobema curtum</i>                      | Invertebrate | 1989 | -4 | 0.06 | \$84,788     |
| <i>Lampsilis powellii</i>                     | Invertebrate | 1992 | -4 | 0.05 | \$292,160    |
| <i>Euphydryas editha quino</i>                | Invertebrate | 2003 | -4 | 0.04 | \$11,937,915 |
| <i>Texella cokendolpheri</i>                  | Invertebrate | 2011 | -4 | 0.01 | \$1,580,600  |
| <i>Orthalicus reses</i>                       | Invertebrate | 1989 | -4 | 0    | \$5,627,059  |
| <i>Haliotis sorenseni</i>                     | Invertebrate | 2009 | -3 | 0.8  | \$1,079,972  |
| <i>Icaricia icarioides fenderi</i>            | Invertebrate | 2010 | -3 | 0.77 | \$306,421    |
| <i>Pleurobema perovatum</i>                   | Invertebrate | 2000 | -3 | 0.61 | \$52,466     |
| <i>Pleurobema collina</i>                     | Invertebrate | 1990 | -3 | 0.58 | \$124,897    |
| <i>Tartarocreagris texana</i>                 | Invertebrate | 1994 | -3 | 0.39 | \$182,419    |
| <i>Quadrula fragosa</i>                       | Invertebrate | 1997 | -3 | 0.35 | \$544,958    |
| <i>Potamilus inflatus</i>                     | Invertebrate | 1989 | -3 | 0.25 | \$84,788     |
| <i>Pleurobema pyriforme</i>                   | Invertebrate | 2003 | -3 | 0.25 | \$199,281    |
| <i>Antrobia culveri</i>                       | Invertebrate | 2003 | -3 | 0.11 | \$366,268    |
| <i>Stygobromus pecki</i>                      | Invertebrate | 1996 | -3 | 0.09 | \$200,152    |
| <i>Cicurina madla</i>                         | Invertebrate | 2011 | -3 | 0.06 | \$1,580,600  |
| <i>Rhadine exilis</i>                         | Invertebrate | 2011 | -3 | 0.06 | \$1,580,600  |
| <i>Rhadine infernalis</i>                     | Invertebrate | 2011 | -3 | 0.06 | \$1,580,600  |
| <i>Batrisodes texanus</i>                     | Invertebrate | 1994 | -3 | 0.03 | \$182,419    |
| <i>Cicurina venii</i>                         | Invertebrate | 2011 | -3 | 0.01 | \$1,580,600  |
| <i>Neoleptoneta myopica</i>                   | Invertebrate | 1994 | -2 | 0.63 | \$182,419    |

|                                         |              |      |    |      |             |
|-----------------------------------------|--------------|------|----|------|-------------|
| <i>Neonympha mitchellii mitchellii</i>  | Invertebrate | 1998 | -2 | 0.53 | \$159,445   |
| <i>Rhadine persephone</i>               | Invertebrate | 1994 | -2 | 0.44 | \$182,419   |
| <i>Texamaurops reddelli</i>             | Invertebrate | 1994 | -2 | 0.44 | \$182,419   |
| <i>Amblyma neislerii</i>                | Invertebrate | 2003 | -2 | 0.39 | \$199,281   |
| <i>Texella reddelli</i>                 | Invertebrate | 1994 | -2 | 0.33 | \$182,419   |
| <i>Oxyloma haydeni kanabensis</i>       | Invertebrate | 1995 | -2 | 0.27 | \$291,210   |
| <i>Heterelmis comalensis</i>            | Invertebrate | 1996 | -2 | 0.15 | \$200,152   |
| <i>Microhexura montivaga</i>            | Invertebrate | 1998 | -2 | 0.14 | \$74,598    |
| <i>Euproserpinus euterpe</i>            | Invertebrate | 1984 | -2 | 0.08 | \$192,043   |
| <i>Heraclides aristodemus ponceanus</i> | Invertebrate | 1989 | -2 | 0.03 | \$5,627,059 |
| <i>Elliptoideus sloatianus</i>          | Invertebrate | 2003 | -1 | 0.38 | \$199,281   |
| <i>Speyeria zerene myrtleae</i>         | Invertebrate | 1998 | -1 | 0.36 | \$32,204    |
| <i>Palaemonias alabamiae</i>            | Invertebrate | 1997 | -1 | 0.35 | \$87,967    |
| <i>Leptoxis plicata</i>                 | Invertebrate | 2005 | -1 | 0.29 | \$24,792    |
| <i>Pyrgulopsis ogmorhapse</i>           | Invertebrate | 1995 | -1 | 0.18 | \$34,425    |
| <i>Alasmidonta atropurpurea</i>         | Invertebrate | 2004 | -1 | 0.17 | \$185,755   |
| <i>Leptoxis taeniata</i>                | Invertebrate | 2005 | -1 | 0.13 | \$24,792    |
| <i>Lepyrium showalteri</i>              | Invertebrate | 2005 | -1 | 0.13 | \$24,792    |
| <i>Elimia crenatella</i>                | Invertebrate | 2005 | -1 | 0.12 | \$24,792    |
| <i>Erinna newcombi</i>                  | Invertebrate | 2006 | -1 | 0.12 | \$209,629   |
| <i>Branchinecta longiantenna</i>        | Invertebrate | 2006 | -1 | 0.1  | \$2,084,542 |
| <i>Branchinecta conservatio</i>         | Invertebrate | 2006 | -1 | 0.09 | \$2,084,542 |
| <i>Mesodon clarki nantahala</i>         | Invertebrate | 1984 | -1 | 0.05 | \$20,907    |
| <i>Apodemia mormo langei</i>            | Invertebrate | 1984 | -1 | 0.04 | \$1,029,155 |
| <i>Batrisodes venyivi</i>               | Invertebrate | 2011 | -1 | 0.01 | \$1,580,600 |
| <i>Neoleptoneta microps</i>             | Invertebrate | 2011 | -1 | 0.01 | \$1,580,600 |
| <i>Cicurina vespera</i>                 | Invertebrate | 2011 | -1 | 0.01 | \$1,580,600 |
| <i>Cambarus aculabrum</i>               | Invertebrate | 1996 | 0  | 0.75 | \$89,293    |
| <i>Callophrys mossii bayensis</i>       | Invertebrate | 1984 | 0  | 0.72 | \$52,453    |
| <i>Lanx sp.</i>                         | Invertebrate | 1995 | 0  | 0.61 | \$71,176    |
| <i>Pyrgulopsis neomexicana</i>          | Invertebrate | 1994 | 0  | 0.49 | \$7,929     |
| <i>Lampsilis subangulata</i>            | Invertebrate | 2003 | 0  | 0.38 | \$199,281   |
| <i>Ambryus amargosus</i>                | Invertebrate | 1990 | 0  | 0.36 | \$68,094    |
| <i>Anguispira picta</i>                 | Invertebrate | 1982 | 0  | 0.33 | \$14,460    |
| <i>Lycaeides melissa samuelis</i>       | Invertebrate | 2003 | 0  | 0.33 | \$1,950,720 |
| <i>Medionidus penicillatus</i>          | Invertebrate | 2003 | 0  | 0.27 | \$199,281   |
| <i>Pseudocopaeodes eunus obscurus</i>   | Invertebrate | 2007 | 0  | 0.24 | \$310,884   |
| <i>Mesodon magazinensis</i>             | Invertebrate | 1994 | 0  | 0.21 | \$18,317    |
| <i>Adelocosa anops</i>                  | Invertebrate | 2006 | 0  | 0.21 | \$99,905    |
| <i>Epioblasma florentina florentina</i> | Invertebrate | 1985 | 0  | 0.21 | \$19,168    |
| <i>Spelaeorchestia koloana</i>          | Invertebrate | 2006 | 0  | 0.2  | \$99,905    |
| <i>Epioblasma turgidula</i>             | Invertebrate | 1985 | 0  | 0.18 | \$19,168    |
| <i>Pyrgulopsis pachyta</i>              | Invertebrate | 1994 | 0  | 0.18 | \$24,264    |
| <i>Brychius hungerfordi</i>             | Invertebrate | 2006 | 0  | 0.17 | \$137,653   |

|                                            |              |      |     |      |              |
|--------------------------------------------|--------------|------|-----|------|--------------|
| <i>Athearnia anthonyi</i>                  | Invertebrate | 1997 | 0   | 0.15 | \$55,693     |
| <i>Lycaeides argyrognomon lotis</i>        | Invertebrate | 1985 | 0   | 0.15 | \$102,352    |
| <i>Epioblasma torulosa torulosa</i>        | Invertebrate | 1985 | 0   | 0.13 | \$57,505     |
| <i>Elliptio chipolaensis</i>               | Invertebrate | 2003 | 0   | 0.13 | \$199,281    |
| <i>Polygyriscus virginianus</i>            | Invertebrate | 1983 | 0   | 0.12 | \$39,000     |
| <i>Cambarus zophonastes</i>                | Invertebrate | 1988 | 0   | 0.12 | \$58,772     |
| <i>Manduca blackburni</i>                  | Invertebrate | 2005 | 0   | 0.06 | \$1,106,700  |
| <i>Lampsilis streckeri</i>                 | Invertebrate | 1992 | 0   | 0.04 | \$285,520    |
| <i>Palaemonias ganteri</i>                 | Invertebrate | 1988 | 0   | 0.04 | \$369,703    |
| <i>Syncaris pacifica</i>                   | Invertebrate | 1998 | 0   | 0.03 | \$2,841,911  |
| <i>Lirceus usdagalun</i>                   | Invertebrate | 1997 | 0   | 0.02 | \$365,158    |
| <i>Elaphrus viridis</i>                    | Invertebrate | 2006 | 0   | 0.02 | \$2,084,542  |
| <i>Speyeria zerene behrensii</i>           | Invertebrate | 2004 | 0   | 0.01 | \$3,133,733  |
| <i>Discus macclintocki</i>                 | Invertebrate | 1984 | 1   | 0.79 | \$61,973     |
| <i>Ptychobranthus greenii</i>              | Invertebrate | 2000 | 1   | 0.58 | \$52,466     |
| <i>Tryonia alamosae</i>                    | Invertebrate | 1994 | 1   | 0.39 | \$7,929      |
| <i>Medionidus simpsonianus</i>             | Invertebrate | 2003 | 1   | 0.19 | \$199,281    |
| <i>Euphilotes battoides allyni</i>         | Invertebrate | 1998 | 1   | 0.15 | \$487,960    |
| <i>Margaritifera hembeli</i>               | Invertebrate | 1990 | 1   | 0.1  | \$515,607    |
| <i>Thermosphaeroma thermophilus</i>        | Invertebrate | 1982 | 1   | 0.1  | \$52,618     |
| <i>Boloria acrocneuma</i>                  | Invertebrate | 1994 | 3   | 0.33 | \$83,733     |
| <i>Hesperia leonardus montana</i>          | Invertebrate | 1998 | 3   | 0.15 | \$56,723     |
| <i>Antrolana lira</i>                      | Invertebrate | 1996 | 3   | 0.11 | \$114,947    |
| <i>Tulotoma magnifica</i>                  | Invertebrate | 2000 | 6   | 0.37 | \$52,466     |
| <i>Potamilus capax</i>                     | Invertebrate | 1989 | 7   | 0.13 | \$1,106,067  |
| <i>Pteropus mariannus mariannus</i>        | Mammal       | 1990 | -10 | 0.28 | \$535,653    |
| <i>Dipodomys heermanni morroensis</i>      | Mammal       | 2000 | -8  | 0.22 | \$579,960    |
| <i>Dipodomys nitratooides nitratooides</i> | Mammal       | 1998 | -8  | 0.2  | \$1,303,380  |
| <i>Dipodomys ingens</i>                    | Mammal       | 1998 | -8  | 0.15 | \$1,303,380  |
| <i>Rangifer tarandus caribou</i>           | Mammal       | 1994 | -7  | 0.6  | \$445,531    |
| <i>Myotis sodalis</i>                      | Mammal       | 2007 | -7  | 0.2  | \$16,655,800 |
| <i>Leopardus pardalis</i>                  | Mammal       | 2010 | -7  | 0.03 | \$9,478,406  |
| <i>Sylvilagus palustris hefneri</i>        | Mammal       | 1989 | -7  | 0.02 | \$5,627,059  |
| <i>Trichechus manatus</i>                  | Mammal       | 2001 | -6  | 0.42 | \$13,200,000 |
| <i>Tamiasciurus hudsonicus grahamensis</i> | Mammal       | 2011 | -6  | 0.19 | \$612,990    |
| <i>Neotoma floridana smalli</i>            | Mammal       | 1989 | -6  | 0.03 | \$5,627,059  |
| <i>Reithrodontomys raviventris</i>         | Mammal       | 2014 | -4  | 0.11 | \$5,183,564  |
| <i>Puma concolor</i>                       | Mammal       | 2008 | -3  | 0.72 | \$3,834,000  |
| <i>Perognathus longimembris pacificus</i>  | Mammal       | 1998 | -3  | 0.41 | \$429,000    |
| <i>Antilocapra americana sonoriensis</i>   | Mammal       | 1998 | -3  | 0.34 | \$1,844,700  |
| <i>Monachus schauinslandi</i>              | Mammal       | 2007 | -3  | 0.17 | \$8,044,960  |
| <i>Dipodomys nitratooides exilis</i>       | Mammal       | 1998 | -3  | 0.08 | \$1,303,380  |
| <i>Peromyscus polionotus trissyllepsis</i> | Mammal       | 1987 | -3  | 0.06 | \$2,364,880  |
| <i>Peromyscus gossypinus allapaticola</i>  | Mammal       | 1989 | -3  | 0.02 | \$5,627,059  |

|                                              |        |      |     |      |              |
|----------------------------------------------|--------|------|-----|------|--------------|
| <i>Oryzomys palustris natator</i>            | Mammal | 1989 | -3  | 0.01 | \$5,627,059  |
| <i>Sylvilagus bachmani riparius</i>          | Mammal | 1998 | -2  | 0.78 | \$1,303,363  |
| <i>Microtus californicus scirpensis</i>      | Mammal | 1997 | -2  | 0.59 | \$61,142     |
| <i>Orcinus orca</i>                          | Mammal | 2008 | -2  | 0.37 | \$3,248,640  |
| <i>Delphinapterus leucas</i>                 | Mammal | 2008 | -2  | 0.34 | \$1,862,136  |
| <i>Eumetopias jubatus</i>                    | Mammal | 2008 | -1  | 0.66 | \$20,269,440 |
| <i>Balaena glacialis</i>                     | Mammal | 2010 | -1  | 0.37 | \$9,658,490  |
| <i>Corynorhinus townsendii ingens</i>        | Mammal | 1995 | -1  | 0.29 | \$488,376    |
| <i>Neotoma fuscipes riparia</i>              | Mammal | 1998 | -1  | 0.1  | \$1,303,363  |
| <i>Cynomys parvidens</i>                     | Mammal | 2012 | -1  | 0.06 | \$3,889,280  |
| <i>Sorex ornatus relictus</i>                | Mammal | 1998 | -1  | 0.06 | \$1,303,363  |
| <i>Microtus mexicanus hualpaiensis</i>       | Mammal | 1991 | -1  | 0.06 | \$382,014    |
| <i>Glaucomys sabrinus coloratus</i>          | Mammal | 1990 | 0   | 0.31 | \$121,040    |
| <i>Lasiurus cinereus semotus</i>             | Mammal | 1998 | 0   | 0.26 | \$888,745    |
| <i>Aplodontia rufa nigra</i>                 | Mammal | 1998 | 0   | 0.17 | \$299,442    |
| <i>Balaenoptera borealis</i>                 | Mammal | 2012 | 0   | 0.14 | \$1,235,176  |
| <i>Balaenoptera physalus</i>                 | Mammal | 2006 | 0   | 0.12 | \$1,401,280  |
| <i>Microtus pennsylvanicus dukecampbelli</i> | Mammal | 1997 | 0   | 0.12 | \$60,900     |
| <i>Peromyscus polionotus peninsularis</i>    | Mammal | 2010 | 0   | 0.12 | \$456,383    |
| <i>Puma concolor cougar</i>                  | Mammal | 1982 | 0   | 0.11 | \$96,400     |
| <i>Enhydra lutris kenyonii</i>               | Mammal | 2013 | 0   | 0.1  | \$3,060,000  |
| <i>Odocoileus virginianus clavium</i>        | Mammal | 1989 | 0   | 0.09 | \$5,627,059  |
| <i>Physeter catodon</i>                      | Mammal | 2010 | 0   | 0.09 | \$4,533,174  |
| <i>Herpailurus yagouaroundi cacomitli</i>    | Mammal | 2013 | 0   | 0.07 | \$2,921,863  |
| <i>Pteropus tokudae</i>                      | Mammal | 1990 | 0   | 0.04 | \$535,653    |
| <i>Spermophilus brunneus brunneus</i>        | Mammal | 2003 | 1   | 0.56 | \$386,842    |
| <i>Urocyon littoralis littoralis</i>         | Mammal | 2012 | 1   | 0.48 | \$392,198    |
| <i>Urocyon littoralis santarosae</i>         | Mammal | 2012 | 1   | 0.45 | \$392,198    |
| <i>Urocyon littoralis santacruzae</i>        | Mammal | 2012 | 1   | 0.33 | \$392,198    |
| <i>Leptonycteris nivalis</i>                 | Mammal | 1994 | 1   | 0.04 | \$807,765    |
| <i>Ovis canadensis nelsoni</i>               | Mammal | 2000 | 1   | 0.01 | \$19,778,310 |
| <i>Ursus arctos horribilis</i>               | Mammal | 1993 | 2   | 0.65 | \$6,535,527  |
| <i>Urocyon littoralis catalinae</i>          | Mammal | 2012 | 2   | 0.07 | \$392,198    |
| <i>Leptonycteris curasoae yerbabuenae</i>    | Mammal | 1997 | 3   | 0.69 | \$307,690    |
| <i>Balaenoptera musculus</i>                 | Mammal | 1998 | 3   | 0.33 | \$448,162    |
| <i>Glaucomys sabrinus fuscus</i>             | Mammal | 1990 | 4   | 0.86 | \$121,040    |
| <i>Canis rufus</i>                           | Mammal | 1990 | 4   | 0.63 | \$1,337,077  |
| <i>Ovis canadensis sierrae</i>               | Mammal | 2008 | 4   | 0.48 | \$1,173,420  |
| <i>Megaptera novaeangliae</i>                | Mammal | 1991 | 4   | 0.1  | \$9,815,400  |
| <i>Odocoileus virginianus leucurus</i>       | Mammal | 1983 | 8   | 0.81 | \$257,400    |
| <i>Mustela nigripes</i>                      | Mammal | 2013 | 9   | 0.26 | \$6,249,200  |
| <i>Torreya taxifolia</i>                     | Plant  | 1986 | -10 | 0.15 | \$122,830    |
| <i>Sagittaria fasciculata</i>                | Plant  | 1983 | -9  | 0.63 | \$28,080     |
| <i>Spiranthes parksii</i>                    | Plant  | 1984 | -9  | 0.29 | \$109,013    |

|                                          |       |      |    |      |             |
|------------------------------------------|-------|------|----|------|-------------|
| <i>Chamaesyce deltoidea deltoidea</i>    | Plant | 1989 | -9 | 0.01 | \$5,627,059 |
| <i>Sidalcea pedata</i>                   | Plant | 1998 | -8 | 0.85 | \$33,748    |
| <i>Prunus geniculata</i>                 | Plant | 1996 | -8 | 0.55 | \$83,599    |
| <i>Lilium occidentale</i>                | Plant | 1998 | -8 | 0.51 | \$197,054   |
| <i>Phacelia argillacea</i>               | Plant | 1982 | -8 | 0.49 | \$14,862    |
| <i>Amsinckia grandiflora</i>             | Plant | 1997 | -8 | 0.32 | \$139,744   |
| <i>Lupinus aridorum</i>                  | Plant | 1996 | -8 | 0.19 | \$83,599    |
| <i>Caesalpinia kavaiense</i>             | Plant | 1994 | -8 | 0.09 | \$286,000   |
| <i>Warea amplexifolia</i>                | Plant | 1993 | -8 | 0.03 | \$131,215   |
| <i>Limnanthes floccosa californica</i>   | Plant | 2006 | -8 | 0.02 | \$2,084,542 |
| <i>Kokia cookei</i>                      | Plant | 1998 | -8 | 0.02 | \$313,860   |
| <i>Acanthomintha obovata duttonii</i>    | Plant | 1998 | -8 | 0    | \$4,415,840 |
| <i>Cereus eriophorus fragrans</i>        | Plant | 1989 | -8 | 0    | \$5,627,059 |
| <i>Galactia smallii</i>                  | Plant | 1989 | -8 | 0    | \$5,627,059 |
| <i>Eriogonum ovalifolium williamsiae</i> | Plant | 1995 | -7 | 0.36 | \$57,400    |
| <i>Dicerandra immaculata</i>             | Plant | 1989 | -7 | 0.11 | \$5,627,059 |
| <i>Spigelia gentianoides</i>             | Plant | 2012 | -7 | 0.11 | \$75,705    |
| <i>Alectryon macrococcus</i>             | Plant | 1997 | -7 | 0.04 | \$1,105,024 |
| <i>Callirhoe scabriuscula</i>            | Plant | 1985 | -7 | 0.01 | \$433,648   |
| <i>Tuctoria mucronata</i>                | Plant | 2006 | -7 | 0.01 | \$2,084,542 |
| <i>Arenaria paludicola</i>               | Plant | 1998 | -6 | 0.77 | \$38,233    |
| <i>Isodendron hosakae</i>                | Plant | 1994 | -6 | 0.71 | \$64,917    |
| <i>Pediocactus despainii</i>             | Plant | 1995 | -6 | 0.61 | \$20,400    |
| <i>Chorizanthe pungens hartwegiana</i>   | Plant | 1998 | -6 | 0.6  | \$33,348    |
| <i>Rhus michauxii</i>                    | Plant | 1993 | -6 | 0.58 | \$144,900   |
| <i>Stephanomeria malheurensis</i>        | Plant | 1991 | -6 | 0.47 | \$56,007    |
| <i>Erysimum teretifolium</i>             | Plant | 1998 | -6 | 0.45 | \$33,348    |
| <i>Flueggea neowawraea</i>               | Plant | 1999 | -6 | 0.42 | \$135,600   |
| <i>Brighamia insignis</i>                | Plant | 1995 | -6 | 0.34 | \$66,531    |
| <i>Potentilla hickmanii</i>              | Plant | 2004 | -6 | 0.3  | \$33,723    |
| <i>Clarkia speciosa immaculata</i>       | Plant | 1998 | -6 | 0.28 | \$46,065    |
| <i>Asclepias meadii</i>                  | Plant | 2003 | -6 | 0.21 | \$251,037   |
| <i>Dicerandra cornutissima</i>           | Plant | 1987 | -6 | 0.13 | \$7,858     |
| <i>Poa mannii</i>                        | Plant | 1995 | -6 | 0.08 | \$66,531    |
| <i>Berberis pinnata insularis</i>        | Plant | 2000 | -6 | 0.08 | \$134,792   |
| <i>Castilleja campestris succulenta</i>  | Plant | 2006 | -6 | 0.03 | \$2,084,542 |
| <i>Ranunculus aestivalis</i>             | Plant | 1991 | -6 | 0.02 | \$228,000   |
| <i>Hibiscadelphus woodii</i>             | Plant | 1998 | -6 | 0.02 | \$173,495   |
| <i>Serianthes nelsonii</i>               | Plant | 1994 | -6 | 0.02 | \$343,187   |
| <i>Coryphantha ramillosa</i>             | Plant | 1990 | -6 | 0.02 | \$139,493   |
| <i>Ziziphus celata</i>                   | Plant | 1989 | -6 | 0.01 | \$5,627,059 |
| <i>Dicerandra frutescens</i>             | Plant | 1989 | -6 | 0    | \$5,627,059 |
| <i>Crotalaria avonensis</i>              | Plant | 1989 | -6 | 0    | \$5,627,059 |
| <i>Amorpha crenulata</i>                 | Plant | 1989 | -6 | 0    | \$5,627,059 |

|                                          |       |      |    |      |             |
|------------------------------------------|-------|------|----|------|-------------|
| <i>Deeringothamnus pulchellus</i>        | Plant | 1989 | -6 | 0    | \$5,627,059 |
| <i>Colubrina oppositifolia</i>           | Plant | 1996 | -5 | 0.85 | \$33,265    |
| <i>Cyanea humboldtiana</i>               | Plant | 1998 | -5 | 0.76 | \$48,051    |
| <i>Rorippa gambellii</i>                 | Plant | 1998 | -5 | 0.6  | \$38,233    |
| <i>Schoenocrambe suffrutescens</i>       | Plant | 1994 | -5 | 0.57 | \$14,304    |
| <i>Eugenia koolauensis</i>               | Plant | 1998 | -5 | 0.51 | \$48,051    |
| <i>Silene polypetala</i>                 | Plant | 1996 | -5 | 0.35 | \$29,107    |
| <i>Pentachaeta lyonii</i>                | Plant | 1999 | -5 | 0.33 | \$62,440    |
| <i>Argemone pleiakantha pinnatisecta</i> | Plant | 1994 | -5 | 0.3  | \$77,087    |
| <i>Astragalus applegatei</i>             | Plant | 1998 | -5 | 0.27 | \$149,490   |
| <i>Helianthus schweinitzii</i>           | Plant | 1994 | -5 | 0.26 | \$183,167   |
| <i>Clermontia drepanomorpha</i>          | Plant | 1996 | -5 | 0.23 | \$33,265    |
| <i>Coryphantha robbinsorum</i>           | Plant | 1993 | -5 | 0.18 | \$44,436    |
| <i>Isodendron laurifolium</i>            | Plant | 1999 | -5 | 0.17 | \$135,600   |
| <i>Nolina brittoniana</i>                | Plant | 1996 | -5 | 0.15 | \$83,599    |
| <i>Euphorbia haeleeleana</i>             | Plant | 1999 | -5 | 0.14 | \$135,600   |
| <i>Panicum fauriei carteri</i>           | Plant | 1993 | -5 | 0.13 | \$43,639    |
| <i>Hibiscus arnottianus immaculatus</i>  | Plant | 1996 | -5 | 0.12 | \$114,626   |
| <i>Dalea foliosa</i>                     | Plant | 1996 | -5 | 0.12 | \$281,940   |
| <i>Isodendron longifolium</i>            | Plant | 1999 | -5 | 0.12 | \$135,600   |
| <i>Cyrtandra crenata</i>                 | Plant | 1998 | -5 | 0.12 | \$48,051    |
| <i>Silene perlmannii</i>                 | Plant | 1998 | -5 | 0.11 | \$48,051    |
| <i>Geum radiatum</i>                     | Plant | 1993 | -5 | 0.11 | \$101,430   |
| <i>Daphnopsis hellerana</i>              | Plant | 1992 | -5 | 0.1  | \$49,247    |
| <i>Hibiscadelphus giffardianus</i>       | Plant | 1998 | -5 | 0.09 | \$77,996    |
| <i>Sicyos alba</i>                       | Plant | 1998 | -5 | 0.08 | \$77,996    |
| <i>Thysanocarpus conchuliferus</i>       | Plant | 2000 | -5 | 0.07 | \$134,792   |
| <i>Hedyotis cookiana</i>                 | Plant | 1995 | -5 | 0.06 | \$66,531    |
| <i>Lasthenia conjugens</i>               | Plant | 2006 | -5 | 0.06 | \$2,084,542 |
| <i>Melicope haupuensis</i>               | Plant | 1995 | -5 | 0.06 | \$66,531    |
| <i>Myrsine linearifolia</i>              | Plant | 1998 | -5 | 0.06 | \$173,495   |
| <i>Schiedea membranacea</i>              | Plant | 1998 | -5 | 0.04 | \$173,495   |
| <i>Chamaecrista glandulosa mirabilis</i> | Plant | 1994 | -5 | 0.04 | \$59,922    |
| <i>Schiedea stellarioides</i>            | Plant | 1998 | -5 | 0.02 | \$173,495   |
| <i>Tetramolopium remyi</i>               | Plant | 1995 | -5 | 0.02 | \$242,844   |
| <i>Tuctoria greenei</i>                  | Plant | 2006 | -5 | 0.02 | \$2,084,542 |
| <i>Oenothera deltoides howellii</i>      | Plant | 1984 | -5 | 0.01 | \$1,029,155 |
| <i>Orcuttia pilosa</i>                   | Plant | 2006 | -5 | 0.01 | \$2,084,542 |
| <i>Chamaesyce hooveri</i>                | Plant | 2006 | -5 | 0.01 | \$2,084,542 |
| <i>Kanaloa kahoowawensis</i>             | Plant | 2002 | -5 | 0.01 | \$467,720   |
| <i>Dudleya setchellii</i>                | Plant | 1998 | -5 | 0.01 | \$4,415,840 |
| <i>Eryngium constancei</i>               | Plant | 2006 | -5 | 0    | \$2,084,542 |
| <i>Asimina tetramera</i>                 | Plant | 1989 | -5 | 0    | \$5,627,059 |
| <i>Eryngium cuneifolium</i>              | Plant | 1989 | -5 | 0    | \$5,627,059 |

|                                             |       |      |    |      |             |
|---------------------------------------------|-------|------|----|------|-------------|
| <i>Warea carteri</i>                        | Plant | 1989 | -5 | 0    | \$5,627,059 |
| <i>Tetraplasandra gymnocarpa</i>            | Plant | 1998 | -4 | 0.83 | \$48,051    |
| <i>Hesperomannia arbuscula</i>              | Plant | 1998 | -4 | 0.56 | \$48,051    |
| <i>Schiedea kealiae</i>                     | Plant | 1998 | -4 | 0.5  | \$48,051    |
| <i>Lipochaeta venosa</i>                    | Plant | 1994 | -4 | 0.5  | \$64,917    |
| <i>Lupinus tidestromii</i>                  | Plant | 1998 | -4 | 0.49 | \$32,204    |
| <i>Sidalcea nelsoniana</i>                  | Plant | 2010 | -4 | 0.48 | \$306,421   |
| <i>Poa siphonoglossa</i>                    | Plant | 1995 | -4 | 0.46 | \$66,531    |
| <i>Sisyrinchium dichotomum</i>              | Plant | 1995 | -4 | 0.44 | \$104,550   |
| <i>Eriogonum longifolium gnaphalifolium</i> | Plant | 1996 | -4 | 0.43 | \$83,599    |
| <i>Pleomele hawaiiensis</i>                 | Plant | 1998 | -4 | 0.43 | \$77,996    |
| <i>Melicope lydgatei</i>                    | Plant | 1998 | -4 | 0.38 | \$48,051    |
| <i>Dudleya cymosa ovatifolia</i>            | Plant | 1999 | -4 | 0.36 | \$62,440    |
| <i>Schiedea nuttallii</i>                   | Plant | 1999 | -4 | 0.36 | \$135,600   |
| <i>Astragalus brauntonii</i>                | Plant | 1999 | -4 | 0.33 | \$62,440    |
| <i>Sanicula purpurea</i>                    | Plant | 1999 | -4 | 0.32 | \$135,600   |
| <i>Pityopsis ruthii</i>                     | Plant | 1992 | -4 | 0.3  | \$53,950    |
| <i>Isoetes tegetiformans</i>                | Plant | 1993 | -4 | 0.3  | \$8,944     |
| <i>Sclerocactus wrightiae</i>               | Plant | 1985 | -4 | 0.26 | \$93,672    |
| <i>Schiedea adamantis</i>                   | Plant | 1994 | -4 | 0.24 | \$33,537    |
| <i>Oxypolis canbyi</i>                      | Plant | 1990 | -4 | 0.24 | \$154,563   |
| <i>Phyllostegia racemosa</i>                | Plant | 1998 | -4 | 0.22 | \$77,996    |
| <i>Arctostaphylos pallida</i>               | Plant | 2014 | -4 | 0.21 | \$41,704    |
| <i>Plantago hawaiiensis</i>                 | Plant | 1996 | -4 | 0.2  | \$33,265    |
| <i>Astragalus osterhoutii</i>               | Plant | 1992 | -4 | 0.19 | \$35,828    |
| <i>Vicia menziesii</i>                      | Plant | 1984 | -4 | 0.17 | \$48,533    |
| <i>Melicope knudsenii</i>                   | Plant | 1995 | -4 | 0.17 | \$66,531    |
| <i>Pteralyxia kauaiensis</i>                | Plant | 1995 | -4 | 0.13 | \$66,531    |
| <i>Cyanea grimesiana grimesiana</i>         | Plant | 1999 | -4 | 0.11 | \$135,600   |
| <i>Castilleja mollis</i>                    | Plant | 2000 | -4 | 0.1  | \$134,792   |
| <i>Hibiscadelphus hualalaiensis</i>         | Plant | 1998 | -4 | 0.1  | \$77,996    |
| <i>Adenophorus periens</i>                  | Plant | 1999 | -4 | 0.1  | \$135,600   |
| <i>Lipochaeta waimeaensis</i>               | Plant | 1995 | -4 | 0.09 | \$66,531    |
| <i>Nesogenes rotensis</i>                   | Plant | 2007 | -4 | 0.09 | \$255,211   |
| <i>Cyanea copelandii copelandii</i>         | Plant | 1996 | -4 | 0.08 | \$33,265    |
| <i>Cyanea pinnatifida</i>                   | Plant | 1998 | -4 | 0.08 | \$48,051    |
| <i>Remya kauaiensis</i>                     | Plant | 1995 | -4 | 0.08 | \$66,531    |
| <i>Kokia drynarioides</i>                   | Plant | 1994 | -4 | 0.08 | \$286,000   |
| <i>Phyllostegia warshaueri</i>              | Plant | 1998 | -4 | 0.07 | \$77,996    |
| <i>Phacelia insularis insularis</i>         | Plant | 2000 | -4 | 0.07 | \$134,792   |
| <i>Hedyotis coriacea</i>                    | Plant | 1997 | -4 | 0.05 | \$1,105,024 |
| <i>Hedyotis purpurea montana</i>            | Plant | 1996 | -4 | 0.05 | \$95,213    |
| <i>Buxus vahlii</i>                         | Plant | 1987 | -4 | 0.05 | \$61,500    |
| <i>Caulanthus californicus</i>              | Plant | 1998 | -4 | 0.05 | \$1,303,380 |

|                                          |       |      |    |      |             |
|------------------------------------------|-------|------|----|------|-------------|
| <i>Alsinidendron lychnoides</i>          | Plant | 1998 | -4 | 0.04 | \$173,495   |
| <i>Osmoxylon mariannense</i>             | Plant | 2007 | -4 | 0.04 | \$255,211   |
| <i>Delissea rivularis</i>                | Plant | 1998 | -4 | 0.03 | \$173,495   |
| <i>Cyanea recta</i>                      | Plant | 1998 | -4 | 0.03 | \$173,495   |
| <i>Opuntia treleasei</i>                 | Plant | 1998 | -4 | 0.03 | \$1,303,380 |
| <i>Kokia kauaiensis</i>                  | Plant | 1998 | -4 | 0.03 | \$173,495   |
| <i>Schiedea kauaiensis</i>               | Plant | 1998 | -4 | 0.03 | \$173,495   |
| <i>Viola kauaiensis wahiawaensis</i>     | Plant | 1998 | -4 | 0.02 | \$173,495   |
| <i>Cardamine micranthera</i>             | Plant | 1991 | -4 | 0.02 | \$127,395   |
| <i>Labordia tinifolia wahiawaensis</i>   | Plant | 1998 | -4 | 0.02 | \$173,495   |
| <i>Echinocereus viridiflorus davisii</i> | Plant | 1984 | -4 | 0.02 | \$104,533   |
| <i>Phyllostegia knudsenii</i>            | Plant | 1998 | -4 | 0.02 | \$173,495   |
| <i>Clermontia samuelii</i>               | Plant | 2002 | -4 | 0.01 | \$467,720   |
| <i>Neostapfia colusana</i>               | Plant | 2006 | -4 | 0.01 | \$2,084,542 |
| <i>Dubautia plantaginea humilis</i>      | Plant | 2002 | -4 | 0.01 | \$467,720   |
| <i>Acaena exigua</i>                     | Plant | 1997 | -4 | 0.01 | \$1,105,024 |
| <i>Labordia tinifolia lanaiensis</i>     | Plant | 2002 | -4 | 0.01 | \$467,720   |
| <i>Streptanthus albidus albidus</i>      | Plant | 1998 | -4 | 0    | \$4,415,840 |
| <i>Polygala lewtonii</i>                 | Plant | 1989 | -4 | 0    | \$5,627,059 |
| <i>Hypericum cumulicola</i>              | Plant | 1989 | -4 | 0    | \$5,627,059 |
| <i>Dicerandra christmanii</i>            | Plant | 1989 | -4 | 0    | \$5,627,059 |
| <i>Chamaesyce rockii</i>                 | Plant | 1998 | -3 | 0.88 | \$48,051    |
| <i>Phyllostegia hirsuta</i>              | Plant | 1998 | -3 | 0.88 | \$48,051    |
| <i>Cyrtandra viridiflora</i>             | Plant | 1998 | -3 | 0.81 | \$48,051    |
| <i>Lobelia gaudichaudii koolauensis</i>  | Plant | 1998 | -3 | 0.76 | \$48,051    |
| <i>Alsinidendron obovatum</i>            | Plant | 1998 | -3 | 0.65 | \$48,051    |
| <i>Labordia cyrtandrae</i>               | Plant | 1998 | -3 | 0.63 | \$48,051    |
| <i>Abutilon sandwicense</i>              | Plant | 1998 | -3 | 0.62 | \$48,051    |
| <i>Scutellaria floridana</i>             | Plant | 1994 | -3 | 0.62 | \$15,308    |
| <i>Lepidium arbuscula</i>                | Plant | 1998 | -3 | 0.54 | \$48,051    |
| <i>Vigna o-wahuensis</i>                 | Plant | 1999 | -3 | 0.53 | \$135,600   |
| <i>Phyllostegia velutina</i>             | Plant | 1998 | -3 | 0.49 | \$77,996    |
| <i>Sclerocactus mesae-verdae</i>         | Plant | 1984 | -3 | 0.48 | \$76,907    |
| <i>Cyanea shipmanii</i>                  | Plant | 1996 | -3 | 0.47 | \$33,265    |
| <i>Phyllostegia mollis</i>               | Plant | 1998 | -3 | 0.45 | \$48,051    |
| <i>Schiedea kaalae</i>                   | Plant | 1998 | -3 | 0.44 | \$48,051    |
| <i>Fremontodendron californicum</i>      |       |      |    |      |             |
| <i>decumbens</i>                         | Plant | 2002 | -3 | 0.43 | \$119,009   |
| <i>Polystichum calderonense</i>          | Plant | 1995 | -3 | 0.43 | \$8,233     |
| <i>Plantago princeps</i>                 | Plant | 1999 | -3 | 0.4  | \$135,600   |
| <i>Lepidium barnebyanum</i>              | Plant | 1993 | -3 | 0.37 | \$26,297    |
| <i>Trematolobelia singularis</i>         | Plant | 1998 | -3 | 0.37 | \$48,051    |
| <i>Lobelia niihauensis</i>               | Plant | 1998 | -3 | 0.37 | \$48,051    |
| <i>Hymenoxys texana</i>                  | Plant | 1990 | -3 | 0.36 | \$106,207   |



|                                             |       |      |    |      |           |
|---------------------------------------------|-------|------|----|------|-----------|
| <i>Bonamia menziesii</i>                    | Plant | 1999 | -3 | 0.36 | \$135,600 |
| <i>Astragalus holmgreniorum</i>             | Plant | 2006 | -3 | 0.34 | \$446,252 |
| <i>Astragalus phoenix</i>                   | Plant | 1990 | -3 | 0.31 | \$68,094  |
| <i>Cyrtandra giffardii</i>                  | Plant | 1996 | -3 | 0.29 | \$33,265  |
| <i>Adiantum vivesii</i>                     | Plant | 1995 | -3 | 0.29 | \$8,233   |
| <i>Ptilimnium nodosum</i>                   | Plant | 1991 | -3 | 0.26 | \$105,450 |
| <i>Isodendrion pyrifolium</i>               | Plant | 1996 | -3 | 0.23 | \$33,265  |
| <i>Lesquerella pallida</i>                  | Plant | 1992 | -3 | 0.19 | \$100,430 |
| <i>Peucedanum sandwicense</i>               | Plant | 1995 | -3 | 0.19 | \$66,531  |
| <i>Styrax portoricensis</i>                 | Plant | 1995 | -3 | 0.18 | \$19,176  |
| <i>Schiedea hookeri</i>                     | Plant | 1999 | -3 | 0.17 | \$135,600 |
| <i>Ochrosia kilaueaensis</i>                | Plant | 1996 | -3 | 0.16 | \$33,265  |
| <i>Exocarpos luteolus</i>                   | Plant | 1995 | -3 | 0.13 | \$66,531  |
| <i>Clematis morefieldii</i>                 | Plant | 1994 | -3 | 0.13 | \$37,680  |
| <i>Gymnoderma lineare</i>                   | Plant | 1997 | -3 | 0.13 | \$139,683 |
| <i>Cyrtandra polyantha</i>                  | Plant | 1998 | -3 | 0.12 | \$48,051  |
| <i>Asclepias welshii</i>                    | Plant | 1992 | -3 | 0.12 | \$138,333 |
| <i>Gouania meyenii</i>                      | Plant | 1998 | -3 | 0.11 | \$48,051  |
| <i>Diellia erecta</i>                       | Plant | 1999 | -3 | 0.11 | \$135,600 |
| <i>Cyanea truncata</i>                      | Plant | 1998 | -3 | 0.1  | \$48,051  |
| <i>Pediocactus bradyi</i>                   | Plant | 1985 | -3 | 0.09 | \$139,603 |
| <i>Astragalus ampullarioides</i>            | Plant | 2006 | -3 | 0.09 | \$446,252 |
| <i>Panicum niihauense</i>                   | Plant | 1999 | -3 | 0.08 | \$135,600 |
| <i>Schiedea spergulina spergulina</i>       | Plant | 1995 | -3 | 0.08 | \$66,531  |
| <i>Gilia tenuiflora hoffmannii</i>          | Plant | 2000 | -3 | 0.08 | \$134,792 |
| <i>Cyrtandra limahuliensis</i>              | Plant | 1995 | -3 | 0.08 | \$66,531  |
| <i>Arabis hoffmannii</i>                    | Plant | 2000 | -3 | 0.08 | \$134,792 |
| <i>Melicope saint-johnii</i>                | Plant | 1998 | -3 | 0.08 | \$48,051  |
| <i>Zanthoxylum dipetalum tomentosum</i>     | Plant | 1998 | -3 | 0.07 | \$77,996  |
| <i>Centaurium sebaeoides</i>                | Plant | 1999 | -3 | 0.07 | \$135,600 |
| <i>Chamaesyce deppeana</i>                  | Plant | 1998 | -3 | 0.07 | \$48,051  |
| <i>Cyathea dryopteroides</i>                | Plant | 1991 | -3 | 0.07 | \$29,070  |
| <i>Astragalus cremnophylax cremnophylax</i> | Plant | 2006 | -3 | 0.07 | \$223,416 |
| <i>Eragrostis fosbergii</i>                 | Plant | 1998 | -3 | 0.07 | \$48,051  |
| <i>Chamaesyce kuwaleana</i>                 | Plant | 1998 | -3 | 0.07 | \$48,051  |
| <i>Diellia pallida</i>                      | Plant | 1995 | -3 | 0.07 | \$66,531  |
| <i>Echinocereus chisoensis chisoensis</i>   | Plant | 1993 | -3 | 0.06 | \$132,805 |
| <i>Neraudia sericea</i>                     | Plant | 1999 | -3 | 0.06 | \$135,600 |
| <i>Poa sandwicensis</i>                     | Plant | 1995 | -3 | 0.06 | \$66,531  |
| <i>Asplenium scolopendrium americanum</i>   | Plant | 1993 | -3 | 0.06 | \$120,170 |
| <i>Dubautia latifolia</i>                   | Plant | 1995 | -3 | 0.06 | \$66,531  |
| <i>Lipochaeta micrantha</i>                 | Plant | 1995 | -3 | 0.05 | \$66,531  |
| <i>Silene alexandri</i>                     | Plant | 1996 | -3 | 0.05 | \$109,168 |
| <i>Stenogyne bifida</i>                     | Plant | 1996 | -3 | 0.05 | \$114,626 |

|                                                |       |      |    |      |             |
|------------------------------------------------|-------|------|----|------|-------------|
| <i>Clermontia oblongifolia brevipes</i>        | Plant | 1996 | -3 | 0.05 | \$114,626   |
| <i>Ilex cookii</i>                             | Plant | 1991 | -3 | 0.05 | \$29,070    |
| <i>Santalum freycinetianum lanaiense</i>       | Plant | 1995 | -3 | 0.05 | \$242,844   |
| <i>Labordia lydgatei</i>                       | Plant | 1994 | -3 | 0.04 | \$130,612   |
| <i>Solanum drymophilum</i>                     | Plant | 1992 | -3 | 0.04 | \$104,303   |
| <i>Melicope reflexa</i>                        | Plant | 1996 | -3 | 0.04 | \$114,626   |
| <i>Schiedea lydgatei</i>                       | Plant | 1996 | -3 | 0.04 | \$114,626   |
| <i>Pritchardia viscosa</i>                     | Plant | 1998 | -3 | 0.03 | \$173,495   |
| <i>Hibiscus waimeae hannerae</i>               | Plant | 1998 | -3 | 0.03 | \$173,495   |
| <i>Amaranthus brownii</i>                      | Plant | 1998 | -3 | 0.02 | \$135,884   |
| <i>Cryptantha crassipes</i>                    | Plant | 1994 | -3 | 0.02 | \$209,464   |
| <i>Cyanea remyi</i>                            | Plant | 1998 | -3 | 0.02 | \$173,495   |
| <i>Cyanea glabra</i>                           | Plant | 2002 | -3 | 0.02 | \$467,720   |
| <i>Echinomastus mariposensis</i>               | Plant | 1990 | -3 | 0.02 | \$146,316   |
| <i>Phyllostegia glabra lanaiensis</i>          | Plant | 1995 | -3 | 0.02 | \$242,844   |
| <i>Pilosocereus robinii</i>                    | Plant | 1989 | -3 | 0.01 | \$5,627,059 |
| <i>Geranium multiflorum</i>                    | Plant | 1997 | -3 | 0.01 | \$1,105,024 |
| <i>Geranium arboreum</i>                       | Plant | 1997 | -3 | 0.01 | \$1,105,024 |
| <i>Argyroxiphium sandwicense macrocephalum</i> | Plant | 1997 | -3 | 0.01 | \$1,105,024 |
| <i>Hedyotis schlechtendahliana remyi</i>       | Plant | 2002 | -3 | 0.01 | \$467,720   |
| <i>Orcuttia viscida</i>                        | Plant | 2006 | -3 | 0.01 | \$2,084,542 |
| <i>Tetramolopium capillare</i>                 | Plant | 1997 | -3 | 0.01 | \$1,105,024 |
| <i>Melicope munroi</i>                         | Plant | 2002 | -3 | 0.01 | \$467,720   |
| <i>Mariscus fauriei</i>                        | Plant | 1997 | -3 | 0.01 | \$1,105,024 |
| <i>Melicope balloui</i>                        | Plant | 1997 | -3 | 0    | \$1,105,024 |
| <i>Lipochaeta kamolensis</i>                   | Plant | 1997 | -3 | 0    | \$1,105,024 |
| <i>Polygonella basiramia</i>                   | Plant | 1989 | -3 | 0    | \$5,627,059 |
| <i>Jacquemontia reclinata</i>                  | Plant | 1989 | -3 | 0    | \$5,627,059 |
| <i>Liatris ohlingerae</i>                      | Plant | 1989 | -3 | 0    | \$5,627,059 |
| <i>Cucurbita okeechobeensis okeechobeensis</i> | Plant | 1989 | -3 | 0    | \$5,627,059 |
| <i>Chorizanthe valida</i>                      | Plant | 1998 | -2 | 0.89 | \$32,204    |
| <i>Hesperomannia arborescens</i>               | Plant | 1998 | -2 | 0.88 | \$48,051    |
| <i>Cyanea superba</i>                          | Plant | 1998 | -2 | 0.72 | \$48,051    |
| <i>Phyllostegia kaalaensis</i>                 | Plant | 1998 | -2 | 0.72 | \$48,051    |
| <i>Asplenium fragile insulare</i>              | Plant | 1998 | -2 | 0.69 | \$121,090   |
| <i>Cyanea longiflora</i>                       | Plant | 1998 | -2 | 0.65 | \$48,051    |
| <i>Chorizanthe howellii</i>                    | Plant | 1998 | -2 | 0.65 | \$32,204    |
| <i>Cyanea grimesiana obatae</i>                | Plant | 1998 | -2 | 0.54 | \$48,051    |
| <i>Alsinidendron trinerve</i>                  | Plant | 1998 | -2 | 0.5  | \$48,051    |
| <i>Cyanea crispa</i>                           | Plant | 1998 | -2 | 0.49 | \$48,051    |
| <i>Rhododendron chapmanii</i>                  | Plant | 1983 | -2 | 0.43 | \$54,600    |
| <i>Myrsine juddii</i>                          | Plant | 1998 | -2 | 0.43 | \$48,051    |

|                                              |       |      |    |      |             |
|----------------------------------------------|-------|------|----|------|-------------|
| <i>Clermontia peleana</i>                    | Plant | 1996 | -2 | 0.41 | \$33,265    |
| <i>Diellia falcata</i>                       | Plant | 1998 | -2 | 0.35 | \$48,051    |
| <i>Pritchardia affinis</i>                   | Plant | 1996 | -2 | 0.33 | \$33,265    |
| <i>Pteris lidgatei</i>                       | Plant | 1998 | -2 | 0.32 | \$121,090   |
| <i>Goetzea elegans</i>                       | Plant | 1987 | -2 | 0.28 | \$64,917    |
| <i>Cyrtandra tintinnabula</i>                | Plant | 1996 | -2 | 0.26 | \$33,265    |
| <i>Ischaemum byrone</i>                      | Plant | 1996 | -2 | 0.26 | \$33,265    |
| <i>Arabis perstellata</i>                    | Plant | 1997 | -2 | 0.24 | \$60,658    |
| <i>Sarracenia rubra jonesii</i>              | Plant | 1990 | -2 | 0.24 | \$126,083   |
| <i>Auerodendron pauciflorum</i>              | Plant | 1997 | -2 | 0.23 | \$15,708    |
| <i>Achyranthes splendens rotundata</i>       | Plant | 1993 | -2 | 0.22 | \$30,112    |
| <i>Deinandra conjugens</i>                   | Plant | 2004 | -2 | 0.21 | \$1,018,264 |
| <i>Campanula robinsiae</i>                   | Plant | 1994 | -2 | 0.2  | \$17,035    |
| <i>Sarracenia rubra alabamensis</i>          | Plant | 1992 | -2 | 0.19 | \$54,780    |
| <i>Stenogyne angustifolia angustifolia</i>   | Plant | 1993 | -2 | 0.18 | \$278,262   |
| <i>Camissonia benitensis</i>                 | Plant | 2006 | -2 | 0.18 | \$180,496   |
| <i>Lyonia truncata proctorii</i>             | Plant | 1995 | -2 | 0.16 | \$16,150    |
| <i>Cordia bellonis</i>                       | Plant | 1999 | -2 | 0.15 | \$37,333    |
| <i>Astragalus lentiginosus piscinensis</i>   | Plant | 1998 | -2 | 0.14 | \$130,216   |
| <i>Mitracarpus maxwelliae</i>                | Plant | 1998 | -2 | 0.14 | \$17,001    |
| <i>Plagiobothrys hirtus</i>                  | Plant | 2003 | -2 | 0.13 | \$362,712   |
| <i>Dudleya verityi</i>                       | Plant | 1999 | -2 | 0.13 | \$62,440    |
| <i>Dudleya abramsii parva</i>                | Plant | 1999 | -2 | 0.12 | \$62,440    |
| <i>Harrisia portoricensis</i>                | Plant | 1996 | -2 | 0.12 | \$36,507    |
| <i>Cyperus trachysanthos</i>                 | Plant | 1999 | -2 | 0.12 | \$135,600   |
| <i>Abronia macrocarpa</i>                    | Plant | 1992 | -2 | 0.12 | \$112,576   |
| <i>Sedum integrifolium leedyi</i>            | Plant | 1998 | -2 | 0.11 | \$85,228    |
| <i>Cirsium pitcheri</i>                      | Plant | 2002 | -2 | 0.1  | \$525,382   |
| <i>Pediocactus peeblesianus peeblesianus</i> | Plant | 1984 | -2 | 0.1  | \$99,307    |
| <i>Gouania hillebrandii</i>                  | Plant | 1990 | -2 | 0.1  | \$36,312    |
| <i>Phyllostegia mannii</i>                   | Plant | 1996 | -2 | 0.09 | \$114,626   |
| <i>Calyptanthus thomasiana</i>               | Plant | 1997 | -2 | 0.09 | \$41,567    |
| <i>Cornutia obovata</i>                      | Plant | 1992 | -2 | 0.09 | \$49,247    |
| <i>Purshia subintegra</i>                    | Plant | 1995 | -2 | 0.09 | \$188,037   |
| <i>Arctostaphylos confertiflora</i>          | Plant | 2000 | -2 | 0.08 | \$134,792   |
| <i>Remya montgomeryi</i>                     | Plant | 1995 | -2 | 0.08 | \$66,531    |
| <i>Cyanea platyphylla</i>                    | Plant | 1998 | -2 | 0.07 | \$77,996    |
| <i>Malacothrix indecora</i>                  | Plant | 2000 | -2 | 0.07 | \$134,792   |
| <i>Aristida portoricensis</i>                | Plant | 1994 | -2 | 0.06 | \$59,922    |
| <i>Cranichis ricartii</i>                    | Plant | 1996 | -2 | 0.06 | \$37,000    |
| <i>Stenogyne campanulata</i>                 | Plant | 1995 | -2 | 0.06 | \$66,531    |
| <i>Lembertia congdonii</i>                   | Plant | 1998 | -2 | 0.06 | \$1,303,363 |
| <i>Cyanea asarifolia</i>                     | Plant | 1995 | -2 | 0.06 | \$66,531    |
| <i>Labordia triflora</i>                     | Plant | 2002 | -2 | 0.04 | \$467,720   |

|                                         |       |      |    |      |             |
|-----------------------------------------|-------|------|----|------|-------------|
| <i>Schoepfia arenaria</i>               | Plant | 1992 | -2 | 0.04 | \$107,070   |
| <i>Cyanea procera</i>                   | Plant | 1996 | -2 | 0.03 | \$114,626   |
| <i>Alsinidendron viscosum</i>           | Plant | 1998 | -2 | 0.03 | \$173,495   |
| <i>Cyanea undulata</i>                  | Plant | 1994 | -2 | 0.03 | \$130,612   |
| <i>Bidens micrantha kalealaha</i>       | Plant | 1997 | -2 | 0.03 | \$1,105,024 |
| <i>Banara vanderbiltii</i>              | Plant | 1991 | -2 | 0.03 | \$95,190    |
| <i>Hesperomannia lydgatei</i>           | Plant | 1994 | -2 | 0.02 | \$130,612   |
| <i>Cyanea mannii</i>                    | Plant | 1996 | -2 | 0.02 | \$114,626   |
| <i>Phyllostegia wawrana</i>             | Plant | 1998 | -2 | 0.02 | \$173,495   |
| <i>Potamogeton clystocarpus</i>         | Plant | 1994 | -2 | 0.02 | \$135,543   |
| <i>Erysimum capitatum angustatum</i>    | Plant | 1984 | -2 | 0.02 | \$1,029,155 |
| <i>Cyanea macrostegia gibsonii</i>      | Plant | 1995 | -2 | 0.02 | \$242,844   |
| <i>Cyanea copelandii haleakalaensis</i> | Plant | 2002 | -2 | 0.01 | \$467,720   |
| <i>Gahnia lanaiensis</i>                | Plant | 1995 | -2 | 0.01 | \$242,844   |
| <i>Coryphantha minima</i>               | Plant | 1984 | -2 | 0.01 | \$95,573    |
| <i>Allium munzii</i>                    | Plant | 1997 | -2 | 0.01 | \$1,105,024 |
| <i>Quercus hinckleyi</i>                | Plant | 1992 | -2 | 0.01 | \$196,013   |
| <i>Huperzia mannii</i>                  | Plant | 1997 | -2 | 0.01 | \$1,105,024 |
| <i>Melicope ovalis</i>                  | Plant | 1997 | -2 | 0.01 | \$1,105,024 |
| <i>Melicope mucronulata</i>             | Plant | 1997 | -2 | 0.01 | \$1,105,024 |
| <i>Cyanea lobata</i>                    | Plant | 1997 | -2 | 0.01 | \$1,105,024 |
| <i>Cirsium hydrophilum hydrophilum</i>  | Plant | 2014 | -2 | 0    | \$5,183,564 |
| <i>Clitoria fragrans</i>                | Plant | 1989 | -2 | 0    | \$5,627,059 |
| <i>Eriophyllum latilobum</i>            | Plant | 1998 | -2 | 0    | \$4,415,840 |
| <i>Polygonella myriophylla</i>          | Plant | 1989 | -2 | 0    | \$5,627,059 |
| <i>Parvisedum leiocarpum</i>            | Plant | 2006 | -2 | 0    | \$2,084,542 |
| <i>Polygala smallii</i>                 | Plant | 1989 | -2 | 0    | \$5,627,059 |
| <i>Nototrichium humile</i>              | Plant | 1998 | -1 | 0.81 | \$48,051    |
| <i>Lupinus sulphureus</i>               | Plant | 2010 | -1 | 0.81 | \$306,421   |
| <i>Aeschynomene virginica</i>           | Plant | 1995 | -1 | 0.8  | \$103,275   |
| <i>Sanicula mariversa</i>               | Plant | 1998 | -1 | 0.77 | \$48,051    |
| <i>Chamaesyce celastroides kaenana</i>  | Plant | 1998 | -1 | 0.68 | \$48,051    |
| <i>Silene spaldingii</i>                | Plant | 2007 | -1 | 0.68 | \$285,468   |
| <i>Chamaesyce herbstii</i>              | Plant | 1998 | -1 | 0.65 | \$48,051    |
| <i>Townsendia aprica</i>                | Plant | 1993 | -1 | 0.58 | \$28,980    |
| <i>Cyanea st-johnii</i>                 | Plant | 1998 | -1 | 0.49 | \$48,051    |
| <i>Physaria obcordata</i>               | Plant | 1993 | -1 | 0.48 | \$15,899    |
| <i>Urera kaalae</i>                     | Plant | 1998 | -1 | 0.46 | \$48,051    |
| <i>Nitrophila mohavensis</i>            | Plant | 1990 | -1 | 0.46 | \$68,094    |
| <i>Stenogyne kanehoana</i>              | Plant | 1998 | -1 | 0.44 | \$48,051    |
| <i>Conradina verticillata</i>           | Plant | 1996 | -1 | 0.38 | \$48,100    |
| <i>Lomatium cookii</i>                  | Plant | 2013 | -1 | 0.37 | \$219,688   |
| <i>Lesquerella congesta</i>             | Plant | 1993 | -1 | 0.36 | \$21,198    |
| <i>Schoenocrambe barnebyi</i>           | Plant | 1994 | -1 | 0.34 | \$14,304    |

|                                           |       |      |    |      |             |
|-------------------------------------------|-------|------|----|------|-------------|
| <i>Chamaesyce skottsbergii kalaeloana</i> | Plant | 1993 | -1 | 0.32 | \$30,112    |
| <i>Lithophragma maximum</i>               | Plant | 1984 | -1 | 0.31 | \$90,048    |
| <i>Thelypteris yaucoensis</i>             | Plant | 1995 | -1 | 0.28 | \$8,233     |
| <i>Platanthera leucophaea</i>             | Plant | 1999 | -1 | 0.27 | \$354,333   |
| <i>Catesbaea melanocarpa</i>              | Plant | 2005 | -1 | 0.26 | \$61,999    |
| <i>Vernonia proctorii</i>                 | Plant | 1995 | -1 | 0.24 | \$16,150    |
| <i>Aristida chaseae</i>                   | Plant | 1995 | -1 | 0.23 | \$16,150    |
| <i>Callicarpa ampla</i>                   | Plant | 1995 | -1 | 0.23 | \$19,176    |
| <i>Munroidendron racemosum</i>            | Plant | 1995 | -1 | 0.22 | \$66,531    |
| <i>Ctenitis squamigera</i>                | Plant | 1998 | -1 | 0.18 | \$121,090   |
| <i>Elaphoglossum serpens</i>              | Plant | 1995 | -1 | 0.18 | \$8,233     |
| <i>Ottoschulzia rhodoxylon</i>            | Plant | 1994 | -1 | 0.14 | \$53,642    |
| <i>Abutilon menziesii</i>                 | Plant | 1995 | -1 | 0.14 | \$242,844   |
| <i>Ilex sintenisii</i>                    | Plant | 1995 | -1 | 0.14 | \$19,176    |
| <i>Polygonum hickmanii</i>                | Plant | 1998 | -1 | 0.13 | \$33,348    |
| <i>Dudleya cymosa marcescens</i>          | Plant | 1999 | -1 | 0.13 | \$62,440    |
| <i>Solanum sandwicense</i>                | Plant | 1995 | -1 | 0.13 | \$63,507    |
| <i>Canavalia molokaiensis</i>             | Plant | 1996 | -1 | 0.13 | \$114,626   |
| <i>Mariscus pennatiformis</i>             | Plant | 1999 | -1 | 0.12 | \$135,600   |
| <i>Pritchardia munroi</i>                 | Plant | 1996 | -1 | 0.12 | \$114,626   |
| <i>Pediocactus knowltonii</i>             | Plant | 1985 | -1 | 0.12 | \$117,903   |
| <i>Ipomopsis sancti-spiritus</i>          | Plant | 2002 | -1 | 0.12 | \$82,238    |
| <i>Cyrtandra munroi</i>                   | Plant | 1995 | -1 | 0.11 | \$242,844   |
| <i>Bidens wiebkei</i>                     | Plant | 1996 | -1 | 0.11 | \$114,626   |
| <i>Lipochaeta lobata leptophylla</i>      | Plant | 1998 | -1 | 0.11 | \$48,051    |
| <i>Melicope pallida</i>                   | Plant | 1995 | -1 | 0.1  | \$66,531    |
| <i>Lobelia monostachya</i>                | Plant | 1998 | -1 | 0.1  | \$48,051    |
| <i>Lessingia germanorum</i>               | Plant | 2003 | -1 | 0.1  | \$181,769   |
| <i>Pleodendron macranthum</i>             | Plant | 1998 | -1 | 0.1  | \$45,522    |
| <i>Cordylanthus palmatus</i>              | Plant | 1998 | -1 | 0.09 | \$1,303,380 |
| <i>Diellia unisora</i>                    | Plant | 1998 | -1 | 0.09 | \$48,051    |
| <i>Phyllostegia hispida</i>               | Plant | 2013 | -1 | 0.08 | \$668,712   |
| <i>Delissea rhytidosperma</i>             | Plant | 1995 | -1 | 0.08 | \$66,531    |
| <i>Lipochaeta fauriei</i>                 | Plant | 1995 | -1 | 0.08 | \$66,531    |
| <i>Galium buxifolium</i>                  | Plant | 2000 | -1 | 0.08 | \$134,792   |
| <i>Schiedea spergulina leiopoda</i>       | Plant | 1995 | -1 | 0.07 | \$66,531    |
| <i>Chamaesyce halemanui</i>               | Plant | 1995 | -1 | 0.07 | \$66,531    |
| <i>Diplazium molokaiense</i>              | Plant | 1998 | -1 | 0.07 | \$121,090   |
| <i>Platanthera holochila</i>              | Plant | 1999 | -1 | 0.07 | \$135,600   |
| <i>Justicia cooleyi</i>                   | Plant | 1994 | -1 | 0.06 | \$17,035    |
| <i>Hibiscus clayi</i>                     | Plant | 1995 | -1 | 0.06 | \$66,531    |
| <i>Schiedea apokremnos</i>                | Plant | 1995 | -1 | 0.06 | \$66,531    |
| <i>Hedyotis st.-johnii</i>                | Plant | 1995 | -1 | 0.06 | \$66,531    |
| <i>Thelypteris pilosa alabamensis</i>     | Plant | 1996 | -1 | 0.06 | \$29,107    |

|                                          |       |      |    |      |             |
|------------------------------------------|-------|------|----|------|-------------|
| <i>Gesneria pauciflora</i>               | Plant | 1998 | -1 | 0.05 | \$38,133    |
| <i>Melicope quadrangularis</i>           | Plant | 1995 | -1 | 0.05 | \$66,531    |
| <i>Monolopia congdonii</i>               | Plant | 1998 | -1 | 0.05 | \$1,303,380 |
| <i>Hedyotis mannii</i>                   | Plant | 1996 | -1 | 0.05 | \$114,626   |
| <i>Lysimachia filifolia</i>              | Plant | 1995 | -1 | 0.05 | \$66,531    |
| <i>Hibiscadelphus distans</i>            | Plant | 1996 | -1 | 0.05 | \$200,762   |
| <i>Achyranthes mutica</i>                | Plant | 1999 | -1 | 0.05 | \$135,600   |
| <i>Tetramolopium rockii</i>              | Plant | 1996 | -1 | 0.04 | \$114,626   |
| <i>Marsilea villosa</i>                  | Plant | 1996 | -1 | 0.04 | \$209,338   |
| <i>Cyrtandra cyaneoides</i>              | Plant | 1998 | -1 | 0.03 | \$173,495   |
| <i>Eremalche kernensis</i>               | Plant | 1998 | -1 | 0.03 | \$1,303,380 |
| <i>Orcuttia tenuis</i>                   | Plant | 2006 | -1 | 0.03 | \$2,084,542 |
| <i>Schiedea verticillata</i>             | Plant | 1998 | -1 | 0.02 | \$135,884   |
| <i>Pritchardia napaliensis</i>           | Plant | 1998 | -1 | 0.02 | \$173,495   |
| <i>Cyanea dunbarii</i>                   | Plant | 1998 | -1 | 0.02 | \$699,032   |
| <i>Abutilon eremitopetalum</i>           | Plant | 1995 | -1 | 0.02 | \$242,844   |
| <i>Gardenia brighamii</i>                | Plant | 1993 | -1 | 0.02 | \$839,436   |
| <i>Schiedea helleri</i>                  | Plant | 1998 | -1 | 0.02 | \$173,495   |
| <i>Hymenoxys herbacea</i>                | Plant | 1990 | -1 | 0.01 | \$708,262   |
| <i>Melicope adscendens</i>               | Plant | 1997 | -1 | 0.01 | \$1,105,024 |
| <i>Orcuttia inaequalis</i>               | Plant | 2006 | -1 | 0.01 | \$2,084,542 |
| <i>Schiedea haleakalensis</i>            | Plant | 1997 | -1 | 0.01 | \$1,105,024 |
| <i>Lesquerella perforata</i>             | Plant | 2006 | -1 | 0.01 | \$1,486,540 |
| <i>Clermontia oblongifolia mauiensis</i> | Plant | 1997 | -1 | 0.01 | \$1,105,024 |
| <i>Remya mauiensis</i>                   | Plant | 1997 | -1 | 0.01 | \$1,105,024 |
| <i>Cladonia perforata</i>                | Plant | 1989 | -1 | 0    | \$5,627,059 |
| <i>Lysimachia lydgatei</i>               | Plant | 1997 | -1 | 0    | \$1,105,024 |
| <i>Schiedea sarmentosa</i>               | Plant | 1998 | -1 | 0    | \$699,032   |
| <i>Cirsium fontinale fontinale</i>       | Plant | 1998 | -1 | 0    | \$4,415,840 |
| <i>Ceanothus ferrisae</i>                | Plant | 1998 | -1 | 0    | \$4,415,840 |
| <i>Castilleja affinis neglecta</i>       | Plant | 1998 | -1 | 0    | \$4,415,840 |
| <i>Cordylanthus tenuis capillaris</i>    | Plant | 1998 | -1 | 0    | \$4,415,840 |
| <i>Chamaesyce garberi</i>                | Plant | 1989 | -1 | 0    | \$5,627,059 |
| <i>Navarretia leucocephala plieantha</i> | Plant | 2006 | -1 | 0    | \$2,084,542 |
| <i>Pritchardia kaalae</i>                | Plant | 1998 | 0  | 0.82 | \$48,051    |
| <i>Phlegmariurus nutans</i>              | Plant | 1998 | 0  | 0.79 | \$48,051    |
| <i>Hedyotis parvula</i>                  | Plant | 1998 | 0  | 0.73 | \$48,051    |
| <i>Tetramolopium filiforme</i>           | Plant | 1998 | 0  | 0.71 | \$48,051    |
| <i>Thelypodium howellii spectabilis</i>  | Plant | 2002 | 0  | 0.68 | \$66,048    |
| <i>Lipochaeta tenuifolia</i>             | Plant | 1998 | 0  | 0.67 | \$48,051    |
| <i>Dubautia herbstobatae</i>             | Plant | 1998 | 0  | 0.66 | \$48,051    |
| <i>Hedyotis degeneri</i>                 | Plant | 1998 | 0  | 0.65 | \$48,051    |
| <i>Arabis macdonaldiana</i>              | Plant | 1984 | 0  | 0.62 | \$100,053   |
| <i>Cupressus abramsiana</i>              | Plant | 1998 | 0  | 0.62 | \$14,729    |

|                                                |       |      |   |      |             |
|------------------------------------------------|-------|------|---|------|-------------|
| <i>Silene lanceolata</i>                       | Plant | 1996 | 0 | 0.61 | \$109,168   |
| <i>Spermolepis hawaiiensis</i>                 | Plant | 1999 | 0 | 0.6  | \$135,600   |
| <i>Clermontia lindseyana</i>                   | Plant | 1996 | 0 | 0.58 | \$33,265    |
| <i>Solanum incompletum</i>                     | Plant | 1999 | 0 | 0.55 | \$126,560   |
| <i>Ayenia limitaris</i>                        | Plant | 2014 | 0 | 0.55 | \$52,500    |
| <i>Astrophytum asterias</i>                    | Plant | 2003 | 0 | 0.5  | \$103,124   |
| <i>Phlox nivalis texensis</i>                  | Plant | 1995 | 0 | 0.46 | \$104,300   |
| <i>Arctostaphylos morroensis</i>               | Plant | 1998 | 0 | 0.45 | \$46,065    |
| <i>Halophila johnsonii</i>                     | Plant | 2002 | 0 | 0.41 | \$1,498,550 |
| <i>Hibiscus brackenridgei</i>                  | Plant | 1999 | 0 | 0.39 | \$135,600   |
| <i>Trillium persistens</i>                     | Plant | 1984 | 0 | 0.36 | \$16,725    |
| <i>Penstemon haydenii</i>                      | Plant | 1992 | 0 | 0.35 | \$107,589   |
| <i>Arabis serotina</i>                         | Plant | 1991 | 0 | 0.34 | \$38,817    |
| <i>Tectaria estremarana</i>                    | Plant | 1995 | 0 | 0.34 | \$8,233     |
| <i>Carex lutea</i>                             | Plant | 2013 | 0 | 0.33 | \$48,620    |
| <i>Schoenocrambe argillacea</i>                | Plant | 1994 | 0 | 0.33 | \$14,304    |
| <i>Lesquerella thamnophila</i>                 | Plant | 2004 | 0 | 0.32 | \$70,315    |
| <i>Ivesia kingii eremica</i>                   | Plant | 1990 | 0 | 0.3  | \$68,094    |
| <i>Mentzelia leucophylla</i>                   | Plant | 1990 | 0 | 0.29 | \$68,094    |
| <i>Cupressus goveniana goveniana</i>           | Plant | 2004 | 0 | 0.29 | \$33,723    |
| <i>Astragalus montii</i>                       | Plant | 1995 | 0 | 0.28 | \$16,830    |
| <i>Solidago albopilosa</i>                     | Plant | 2009 | 0 | 0.28 | \$30,738    |
| <i>Sagittaria secundifolia</i>                 | Plant | 1991 | 0 | 0.28 | \$53,580    |
| <i>Thlaspi californicum</i>                    | Plant | 2003 | 0 | 0.28 | \$37,592    |
| <i>Cyanea hamatiflora carlsonii</i>            | Plant | 1996 | 0 | 0.27 | \$33,265    |
| <i>Enceliopsis nudicaulis corrugata</i>        | Plant | 1990 | 0 | 0.26 | \$68,094    |
| <i>Mimulus glabratus michiganensis</i>         | Plant | 1997 | 0 | 0.23 | \$41,655    |
| <i>Polystichum aleuticum</i>                   | Plant | 1992 | 0 | 0.22 | \$70,716    |
| <i>Myrcia paganii</i>                          | Plant | 1997 | 0 | 0.22 | \$15,708    |
| <i>Pedicularis furbishiae</i>                  | Plant | 1991 | 0 | 0.21 | \$51,015    |
| <i>Xylosma crenatum</i>                        | Plant | 1995 | 0 | 0.21 | \$66,531    |
| <i>Astragalus tener titi</i>                   | Plant | 2004 | 0 | 0.21 | \$33,723    |
| <i>Thelypteris inabonensis</i>                 | Plant | 1995 | 0 | 0.2  | \$8,233     |
| <i>Thelypteris verecunda</i>                   | Plant | 1995 | 0 | 0.19 | \$8,233     |
| <i>Trifolium trichocalyx</i>                   | Plant | 2004 | 0 | 0.18 | \$33,723    |
| <i>Solidago houghtonii</i>                     | Plant | 1997 | 0 | 0.18 | \$66,766    |
| <i>Oenothera avita eurekaensis</i>             | Plant | 1982 | 0 | 0.15 | \$95,597    |
| <i>Ternstroemia subsessilis</i>                | Plant | 1995 | 0 | 0.15 | \$19,176    |
| <i>Cirsium vinaceum</i>                        | Plant | 1993 | 0 | 0.13 | \$192,395   |
| <i>Leptocereus grantianus</i>                  | Plant | 1995 | 0 | 0.13 | \$31,620    |
| <i>Echinocereus triglochidiatus arizonicus</i> | Plant | 1984 | 0 | 0.13 | \$98,187    |
| <i>Melicope zahlbruckneri</i>                  | Plant | 1998 | 0 | 0.13 | \$77,996    |
| <i>Eriogonum gypsophilum</i>                   | Plant | 1984 | 0 | 0.12 | \$79,893    |
| <i>Phacelia formosula</i>                      | Plant | 1986 | 0 | 0.12 | \$46,860    |

|                                               |       |      |   |      |             |
|-----------------------------------------------|-------|------|---|------|-------------|
| <i>Ternstroemia luquillensis</i>              | Plant | 1995 | 0 | 0.12 | \$19,176    |
| <i>Malacothamnus fasciculatus nesioticus</i>  | Plant | 2000 | 0 | 0.09 | \$134,792   |
| <i>Solidago spithamaea</i>                    | Plant | 1987 | 0 | 0.08 | \$40,658    |
| <i>Malacothrix squalida</i>                   | Plant | 2000 | 0 | 0.07 | \$134,792   |
| <i>Lesquerella lyrata</i>                     | Plant | 1996 | 0 | 0.07 | \$29,107    |
| <i>Amsonia kearneyana</i>                     | Plant | 1993 | 0 | 0.07 | \$124,131   |
| <i>Dudleya nesiotica</i>                      | Plant | 2000 | 0 | 0.07 | \$134,792   |
| <i>Echinocactus horizonthalonius nicholii</i> | Plant | 1986 | 0 | 0.06 | \$137,740   |
| <i>Lepanthes eltoroensis</i>                  | Plant | 1996 | 0 | 0.06 | \$37,000    |
| <i>Thalictrum cooleyi</i>                     | Plant | 1994 | 0 | 0.06 | \$111,208   |
| <i>Trichilia triacantha</i>                   | Plant | 1991 | 0 | 0.05 | \$74,670    |
| <i>Juglans jamaicensis</i>                    | Plant | 1999 | 0 | 0.04 | \$37,333    |
| <i>Eugenia haematocarpa</i>                   | Plant | 1998 | 0 | 0.04 | \$45,522    |
| <i>Astragalus bibullatus</i>                  | Plant | 2011 | 0 | 0.04 | \$569,100   |
| <i>Viola helenae</i>                          | Plant | 1994 | 0 | 0.03 | \$130,612   |
| <i>Dubautia pauciflorula</i>                  | Plant | 1994 | 0 | 0.03 | \$130,612   |
| <i>Echinocereus triglochidiatus</i>           | Plant | 1984 | 0 | 0.02 | \$96,320    |
| <i>Viola lanaiensis</i>                       | Plant | 1995 | 0 | 0.02 | \$242,844   |
| <i>Scaevola coriacea</i>                      | Plant | 1997 | 0 | 0.02 | \$1,105,024 |
| <i>Cordylanthus maritimus maritimus</i>       | Plant | 2014 | 0 | 0.01 | \$5,183,564 |
| <i>Hesperolinon congestum</i>                 | Plant | 1998 | 0 | 0.01 | \$4,415,840 |
| <i>Cordylanthus mollis mollis</i>             | Plant | 2014 | 0 | 0.01 | \$5,183,564 |
| <i>Lysimachia maxima</i>                      | Plant | 1998 | 0 | 0.01 | \$699,032   |
| <i>Clarkia franciscana</i>                    | Plant | 1998 | 0 | 0.01 | \$4,415,840 |
| <i>Cyanea mceldowneyi</i>                     | Plant | 1997 | 0 | 0    | \$1,105,024 |
| <i>Pentachaeta bellidiflora</i>               | Plant | 1998 | 0 | 0    | \$4,415,840 |
| <i>Calochortus tiburonensis</i>               | Plant | 1998 | 0 | 0    | \$4,415,840 |
| <i>Streptanthus niger</i>                     | Plant | 1998 | 0 | 0    | \$4,415,840 |
| <i>Paronychia chartacea</i>                   | Plant | 1989 | 0 | 0    | \$5,627,059 |
| <i>Navarretia leucocephala pauciflora</i>     | Plant | 2006 | 0 | 0    | \$2,084,542 |
| <i>Conradina brevifolia</i>                   | Plant | 1989 | 0 | 0    | \$5,627,059 |
| <i>Erigeron maguirei</i>                      | Plant | 1995 | 1 | 0.83 | \$23,970    |
| <i>Cyrtandra subumbellata</i>                 | Plant | 1998 | 1 | 0.76 | \$48,051    |
| <i>Viola chamissoniana chamissoniana</i>      | Plant | 1998 | 1 | 0.73 | \$48,051    |
| <i>Geocarpon minimum</i>                      | Plant | 1993 | 1 | 0.66 | \$69,767    |
| <i>Gouania vitifolia</i>                      | Plant | 1998 | 1 | 0.58 | \$48,051    |
| <i>Aconitum noveboracense</i>                 | Plant | 1983 | 1 | 0.47 | \$128,700   |
| <i>Phlox hirsuta</i>                          | Plant | 2006 | 1 | 0.46 | \$110,226   |
| <i>Cenchrus agrimonioides</i>                 | Plant | 1999 | 1 | 0.43 | \$135,600   |
| <i>Echinocereus fendleri kuenzleri</i>        | Plant | 1985 | 1 | 0.43 | \$136,710   |
| <i>Lomatium bradshawii</i>                    | Plant | 2010 | 1 | 0.39 | \$306,421   |
| <i>Rhynchospora knieskernii</i>               | Plant | 1993 | 1 | 0.38 | \$41,860    |
| <i>Conradina etonia</i>                       | Plant | 1994 | 1 | 0.29 | \$38,936    |
| <i>Manihot walkerae</i>                       | Plant | 1993 | 1 | 0.28 | \$95,616    |



|                                              |       |      |   |      |             |
|----------------------------------------------|-------|------|---|------|-------------|
| <i>Coryphantha sneedii leei</i>              | Plant | 1986 | 1 | 0.27 | \$20,058    |
| <i>Eugenia woodburyana</i>                   | Plant | 1998 | 1 | 0.27 | \$17,001    |
| <i>Sesbania tomentosa</i>                    | Plant | 1999 | 1 | 0.26 | \$135,600   |
| <i>Limnanthes floccosa grandiflora</i>       | Plant | 2013 | 1 | 0.22 | \$219,688   |
| <i>Haplostachys haplostachya</i>             | Plant | 1993 | 1 | 0.19 | \$278,262   |
| <i>Mitracarpus polycladus</i>                | Plant | 1998 | 1 | 0.19 | \$17,001    |
| <i>Delissea undulata</i>                     | Plant | 1996 | 1 | 0.18 | \$33,265    |
| <i>Penstemon penlandii</i>                   | Plant | 1992 | 1 | 0.15 | \$35,828    |
| <i>Brighamia rockii</i>                      | Plant | 1996 | 1 | 0.15 | \$114,626   |
| <i>Swallenia alexandrae</i>                  | Plant | 1982 | 1 | 0.14 | \$95,597    |
| <i>Tetramolopium lepidotum lepidotum</i>     | Plant | 1998 | 1 | 0.13 | \$48,051    |
| <i>Helianthemum greenei</i>                  | Plant | 2000 | 1 | 0.12 | \$134,792   |
| <i>Phyllostegia parviflora</i>               | Plant | 1999 | 1 | 0.12 | \$135,600   |
| <i>Helenium virginicum</i>                   | Plant | 2000 | 1 | 0.12 | \$170,100   |
| <i>Nothocestrum peltatum</i>                 | Plant | 1995 | 1 | 0.11 | \$66,531    |
| <i>Pritchardia schattaueri</i>               | Plant | 1998 | 1 | 0.08 | \$77,996    |
| <i>Wilkesia hobbyi</i>                       | Plant | 1995 | 1 | 0.08 | \$66,531    |
| <i>Argyroxiphium sandwicense sandwicense</i> | Plant | 1993 | 1 | 0.06 | \$197,386   |
| <i>Eriastrum hooveri</i>                     | Plant | 1998 | 1 | 0.05 | \$1,303,380 |
| <i>Arctostaphylos hookeri ravenii</i>        | Plant | 2003 | 1 | 0.05 | \$181,769   |
| <i>Crescentia portoricensis</i>              | Plant | 1991 | 1 | 0.04 | \$63,270    |
| <i>Pritchardia remota</i>                    | Plant | 1998 | 1 | 0.03 | \$135,884   |
| <i>Cyanea hamatiflora hamatiflora</i>        | Plant | 2002 | 1 | 0.02 | \$467,720   |
| <i>Suaeda californica</i>                    | Plant | 2014 | 1 | 0    | \$5,183,564 |
| <i>Neraudia angulata</i>                     | Plant | 1998 | 2 | 0.82 | \$48,051    |
| <i>Helianthus paradoxus</i>                  | Plant | 2005 | 2 | 0.76 | \$84,582    |
| <i>Platanthera praeclara</i>                 | Plant | 1996 | 2 | 0.53 | \$487,249   |
| <i>Arenaria cumberlandensis</i>              | Plant | 2009 | 2 | 0.48 | \$25,070    |
| <i>Cirsium fontinale obispoense</i>          | Plant | 1998 | 2 | 0.42 | \$46,065    |
| <i>Grindelia fraxino-pratensis</i>           | Plant | 1990 | 2 | 0.38 | \$68,094    |
| <i>Bonamia grandiflora</i>                   | Plant | 1996 | 2 | 0.34 | \$83,599    |
| <i>Echinacea tennesseensis</i>               | Plant | 1989 | 2 | 0.19 | \$82,955    |
| <i>Scirpus ancistrochaetus</i>               | Plant | 1993 | 2 | 0.12 | \$153,487   |
| <i>Dudleya traskiae</i>                      | Plant | 1985 | 2 | 0.1  | \$60,760    |
| <i>Calyptronoma rivalis</i>                  | Plant | 1992 | 2 | 0.09 | \$61,420    |
| <i>Phyllostegia waimeae</i>                  | Plant | 1995 | 2 | 0.08 | \$66,531    |
| <i>Chionanthus pygmaeus</i>                  | Plant | 1989 | 2 | 0.01 | \$5,627,059 |
| <i>Sidalcea oregana calva</i>                | Plant | 2004 | 3 | 0.62 | \$78,720    |
| <i>Centaurium namophilum</i>                 | Plant | 1990 | 3 | 0.42 | \$68,094    |
| <i>Hudsonia montana</i>                      | Plant | 1983 | 3 | 0.31 | \$21,138    |
| <i>Sarracenia oreophila</i>                  | Plant | 1994 | 3 | 0.29 | \$111,993   |
| <i>Mirabilis macfarlanei</i>                 | Plant | 2000 | 3 | 0.15 | \$482,625   |
| <i>Chrysopsis floridana</i>                  | Plant | 2009 | 3 | 0.15 | \$76,300    |
| <i>Conradina glabra</i>                      | Plant | 1994 | 3 | 0.14 | \$44,274    |

|                                          |         |      |     |      |              |
|------------------------------------------|---------|------|-----|------|--------------|
| <i>Stahlia monosperma</i>                | Plant   | 1996 | 3   | 0.05 | \$95,707     |
| <i>Xyris tennesseensis</i>               | Plant   | 1994 | 4   | 0.36 | \$70,127     |
| <i>Hedeoma todsenii</i>                  | Plant   | 2001 | 4   | 0.11 | \$147,840    |
| <i>Oxytropis campestris chartacea</i>    | Plant   | 1991 | 4   | 0.05 | \$181,688    |
| <i>Iliamna corei</i>                     | Plant   | 1990 | 5   | 0.31 | \$24,758     |
| <i>Castilleja grisea</i>                 | Plant   | 1984 | 5   | 0.29 | \$90,048     |
| <i>Malacothamnus clementinus</i>         | Plant   | 1984 | 5   | 0.28 | \$90,048     |
| <i>Delphinium variegatum kinkiense</i>   | Plant   | 1984 | 5   | 0.27 | \$90,048     |
| <i>Marshallia mohrii</i>                 | Plant   | 1991 | 5   | 0.08 | \$56,430     |
| <i>Liatris helleri</i>                   | Plant   | 2000 | 5   | 0.06 | \$65,925     |
| <i>Trifolium stoloniferum</i>            | Plant   | 2007 | 6   | 0.37 | \$155,232    |
| <i>Lotus dendroideus traskiae</i>        | Plant   | 1984 | 6   | 0.34 | \$90,048     |
| <i>Argyroxiphium kauense</i>             | Plant   | 1995 | 6   | 0.26 | \$177,370    |
| <i>Betula uber</i>                       | Plant   | 1990 | 7   | 0.29 | \$28,614     |
| <i>Frankenia johnstonii</i>              | Plant   | 1988 | 8   | 0.41 | \$73,218     |
| <i>Gambelia silus</i>                    | Reptile | 1998 | -10 | 0.23 | \$1,303,380  |
| <i>Dermochelys coriacea</i>              | Reptile | 1995 | -7  | 0.53 | \$4,989,713  |
| <i>Thamnophis sirtalis tetrataenia</i>   | Reptile | 1985 | -7  | 0.47 | \$197,832    |
| <i>Nerodia erythrogaster neglecta</i>    | Reptile | 2008 | -7  | 0.45 | \$388,800    |
| <i>Drymarchon corais couperi</i>         | Reptile | 2009 | -6  | 0.33 | \$1,830,434  |
| <i>Gopherus agassizii</i>                | Reptile | 2011 | -5  | 0.75 | \$11,130,000 |
| <i>Eretmochelys imbricata</i>            | Reptile | 1995 | -5  | 0.56 | \$2,913,120  |
| <i>Thamnophis gigas</i>                  | Reptile | 1999 | -4  | 0.48 | \$3,010,386  |
| <i>Epicrates inornatus</i>               | Reptile | 1986 | -4  | 0.3  | \$142,000    |
| <i>Neoseps reynoldsi</i>                 | Reptile | 1989 | -4  | 0.01 | \$5,627,059  |
| <i>Eumeces egregius lividus</i>          | Reptile | 1989 | -4  | 0.01 | \$5,627,059  |
| <i>Graptemys oculifera</i>               | Reptile | 1988 | -3  | 0.2  | \$71,577     |
| <i>Caretta caretta</i>                   | Reptile | 2008 | -3  | 0.13 | \$32,616,000 |
| <i>Graptemys flavimaculata</i>           | Reptile | 1993 | -3  | 0.12 | \$185,150    |
| <i>Masticophis lateralis euryxanthus</i> | Reptile | 2003 | -2  | 0.22 | \$688,605    |
| <i>Nerodia sipedon insularum</i>         | Reptile | 2003 | 0   | 0.16 | \$243,840    |
| <i>Cyclura cornuta stejnegeri</i>        | Reptile | 1984 | 0   | 0.02 | \$728,000    |
| <i>Anolis roosevelti</i>                 | Reptile | 1983 | 0   | 0.02 | \$70,200     |
| <i>Sphaerodactylus micropithecus</i>     | Reptile | 1986 | 0   | 0.01 | \$564,450    |
| <i>Crotalus willardi obscurus</i>        | Reptile | 1985 | 1   | 0.4  | \$95,480     |
| <i>Ameiva polops</i>                     | Reptile | 1984 | 2   | 0.26 | \$36,587     |
| <i>Chelonia mydas</i>                    | Reptile | 1998 | 2   | 0.14 | \$22,947,210 |
| <i>Nerodia paucimaculata</i>             | Reptile | 1993 | 2   | 0.08 | \$399,426    |
| <i>Epicrates monensis granti</i>         | Reptile | 1986 | 2   | 0.03 | \$281,160    |
| <i>Xantusia riversiana</i>               | Reptile | 1984 | 3   | 0.33 | \$90,048     |
| <i>Epicrates monensis monensis</i>       | Reptile | 1984 | 3   | 0.01 | \$642,133    |
| <i>Crocodylus acutus</i>                 | Reptile | 1989 | 4   | 0.03 | \$5,627,059  |
| <i>Lepidochelys kempii</i>               | Reptile | 2011 | 5   | 0.41 | \$5,251,050  |

**Table S2.** Species whose proposed budgets would be funded by compressing spending on species with excessive budgets and minimal recovery success, rank ordered by cost efficacy.

| <b>Scientific Name</b>                        | <b>Taxon</b> | <b>Year</b> | <b>Status</b> | <b>Proportion budget received</b> | <b>Budget allocated</b> | <b>Figure 2 (blue)</b> |
|-----------------------------------------------|--------------|-------------|---------------|-----------------------------------|-------------------------|------------------------|
| <i>Lobelia oahuensis</i>                      | Plant        | 1998        | -4            | 0.92                              | \$48,051                | 1                      |
| <i>Rana aurora draytonii</i>                  | Amphibian    | 2002        | -5            | 0.91                              | \$2,588,127             | 2                      |
| <i>Vulpes macrotis mutica</i>                 | Mammal       | 1998        | -11           | 0.91                              | \$1,303,380             | 3                      |
| <i>Viola oahuensis</i>                        | Plant        | 1998        | -4            | 0.91                              | \$48,051                | 4                      |
| <i>Thelypodium stenopetalum</i>               | Plant        | 1998        | -7            | 0.9                               | \$33,748                | 5                      |
| <i>Pediocactus winkleri</i>                   | Plant        | 1995        | -7            | 0.9                               | \$20,400                | 6                      |
| <i>Charadrius melodus</i>                     | Bird         | 1996        | -5            | 0.89                              | \$4,777,440             | 7                      |
| <i>Cyprinodon elegans</i>                     | Fish         | 1981        | -7            | 0.89                              | \$54,613                | 8                      |
| <i>Gila robusta jordani</i>                   | Fish         | 1998        | -6            | 0.87                              | \$54,340                | 9                      |
| <i>Glaucopsyche lygdamus palosverdesensis</i> | Invertebrate | 1984        | -4            | 0.85                              | \$128,427               | 10                     |
| <i>Pleurobema decisum</i>                     | Invertebrate | 2000        | -4            | 0.85                              | \$52,466                | 11                     |
| <i>Sidalcea pedata</i>                        | Plant        | 1998        | -8            | 0.85                              | \$33,748                | 12                     |
| <i>Colubrina oppositifolia</i>                | Plant        | 1996        | -5            | 0.85                              | \$33,265                | 13                     |
| <i>Tetraplasandra gymnocarpa</i>              | Plant        | 1998        | -4            | 0.83                              | \$48,051                | 14                     |
| <i>Noturus flavipinnis</i>                    | Fish         | 1983        | -4            | 0.82                              | \$35,880                | 15                     |
| <i>Noturus placidus</i>                       | Fish         | 1991        | -7            | 0.77                              | \$100,646               | 16                     |

|                                        |              |      |    |      |              |    |
|----------------------------------------|--------------|------|----|------|--------------|----|
| <i>Arenaria paludicola</i>             | Plant        | 1998 | -6 | 0.77 | \$38,233     | 17 |
| <i>Cyanea humboldtiana</i>             | Plant        | 1998 | -5 | 0.76 | \$48,051     | 18 |
| <i>Gopherus agassizii</i>              | Reptile      | 2011 | -5 | 0.75 | \$11,130,000 | 19 |
| <i>Polyphylla barbata</i>              | Invertebrate | 1998 | -5 | 0.72 | \$33,348     | 20 |
| <i>Isodendrion hosakae</i>             | Plant        | 1994 | -6 | 0.71 | \$64,917     | 21 |
| <i>Rallus owstoni</i>                  | Bird         | 1990 | -5 | 0.7  | \$331,021    | 22 |
| <i>Neonympha mitchellii francisci</i>  | Invertebrate | 1996 | -4 | 0.7  | \$137,640    | 23 |
| <i>Typhlomolge rathbuni</i>            | Amphibian    | 1996 | -4 | 0.7  | \$60,241     | 24 |
| <i>Achatinella spp.</i>                | Invertebrate | 1992 | -7 | 0.69 | \$395,782    | 25 |
| <i>Pegias fabula</i>                   | Invertebrate | 1989 | -9 | 0.67 | \$116,873    | 26 |
| <i>Lampsilis altilis</i>               | Invertebrate | 2000 | -4 | 0.65 | \$52,466     | 27 |
| <i>Sagittaria fasciculata</i>          | Plant        | 1983 | -9 | 0.63 | \$28,080     | 28 |
| <i>Cicindela puritana</i>              | Invertebrate | 1993 | -5 | 0.61 | \$149,462    | 29 |
| <i>Pediocactus despainii</i>           | Plant        | 1995 | -6 | 0.61 | \$20,400     | 30 |
| <i>Rangifer tarandus caribou</i>       | Mammal       | 1994 | -7 | 0.6  | \$445,531    | 31 |
| <i>Eurycea nana</i>                    | Amphibian    | 1996 | -5 | 0.6  | \$60,241     | 32 |
| <i>Rorippa gambellii</i>               | Plant        | 1998 | -5 | 0.6  | \$38,233     | 33 |
| <i>Chorizanthe pungens hartwegiana</i> | Plant        | 1998 | -6 | 0.6  | \$33,348     | 34 |
| <i>Rhus michauxii</i>                  | Plant        | 1993 | -6 | 0.58 | \$144,900    | 35 |
| <i>Lepidurus packardi</i>              | Invertebrate | 2006 | -6 | 0.57 | \$2,084,542  | 36 |

|                                            |              |      |    |      |             |    |
|--------------------------------------------|--------------|------|----|------|-------------|----|
| <i>Schoenocrambe suffrutescens</i>         | Plant        | 1994 | -5 | 0.57 | \$14,304    | 37 |
| <i>Eretmochelys imbricata</i>              | Reptile      | 1995 | -5 | 0.56 | \$2,913,120 | 38 |
| <i>Hesperomannia arbuscula</i>             | Plant        | 1998 | -4 | 0.56 | \$48,051    | 39 |
| <i>Prunus geniculata</i>                   | Plant        | 1996 | -8 | 0.55 | \$83,599    | 40 |
| <i>Dermochelys coriacea</i>                | Reptile      | 1995 | -7 | 0.53 | \$4,989,713 | 41 |
| <i>Trimerotropis infantilis</i>            | Invertebrate | 1998 | -4 | 0.53 | \$33,348    | 42 |
| <i>Cicindela ohlone</i>                    | Invertebrate | 1998 | -4 | 0.53 | \$33,348    | 43 |
| <i>Lampsilis perovalis</i>                 | Invertebrate | 2000 | -5 | 0.52 | \$52,466    | 44 |
| <i>Lilium occidentale</i>                  | Plant        | 1998 | -8 | 0.51 | \$197,054   | 45 |
| <i>Eugenia koolauensis</i>                 | Plant        | 1998 | -5 | 0.51 | \$48,051    | 46 |
| <i>Lipochaeta venosa</i>                   | Plant        | 1994 | -4 | 0.5  | \$64,917    | 47 |
| <i>Schiedea kealiae</i>                    | Plant        | 1998 | -4 | 0.5  | \$48,051    | 48 |
| <i>Lupinus tidestromii</i>                 | Plant        | 1998 | -4 | 0.49 | \$32,204    | 49 |
| <i>Phacelia argillacea</i>                 | Plant        | 1982 | -8 | 0.49 | \$14,862    | 50 |
| <i>Thamnophis gigas</i>                    | Reptile      | 1999 | -4 | 0.48 | \$3,010,386 | 51 |
| <i>Sidalcea nelsoniana</i>                 | Plant        | 2010 | -4 | 0.48 | \$306,421   | 52 |
| <i>Rhaphiomidas terminatus abdominalis</i> | Invertebrate | 1997 | -5 | 0.48 | \$232,435   | 53 |
| <i>Thamnophis sirtalis tetrataenia</i>     | Reptile      | 1985 | -7 | 0.47 | \$197,832   | 54 |
| <i>Stephanomeria malheurensis</i>          | Plant        | 1991 | -6 | 0.47 | \$56,007    | 55 |
| <i>Poa siphonoglossa</i>                   | Plant        | 1995 | -4 | 0.46 | \$66,531    | 56 |

|                                                 |              |      |     |      |              |    |
|-------------------------------------------------|--------------|------|-----|------|--------------|----|
| <i>Nerodia erythrogaster neglecta</i>           | Reptile      | 2008 | -7  | 0.45 | \$388,800    | 57 |
| <i>Erysimum teretifolium</i>                    | Plant        | 1998 | -6  | 0.45 | \$33,348     | 58 |
| <i>Sisyrinchium dichotomum</i>                  | Plant        | 1995 | -4  | 0.44 | \$104,550    | 59 |
| <i>Eriogonum longifolium<br/>gnaphalifolium</i> | Plant        | 1996 | -4  | 0.43 | \$83,599     | 60 |
| <i>Pleomele hawaiiensis</i>                     | Plant        | 1998 | -4  | 0.43 | \$77,996     | 61 |
| <i>Trichechus manatus</i>                       | Mammal       | 2001 | -6  | 0.42 | \$13,200,000 | 62 |
| <i>Flueggea neowawraea</i>                      | Plant        | 1999 | -6  | 0.42 | \$135,600    | 63 |
| <i>Epioblasma capsaeformis</i>                  | Invertebrate | 2004 | -4  | 0.38 | \$185,755    | 64 |
| <i>Obovaria retusa</i>                          | Invertebrate | 1991 | -7  | 0.38 | \$90,785     | 65 |
| <i>Epioblasma obliquata obliquata</i>           | Invertebrate | 1992 | -10 | 0.38 | \$69,267     | 66 |
| <i>Melicope lydgatei</i>                        | Plant        | 1998 | -4  | 0.38 | \$48,051     | 67 |
| <i>Texella reyesi</i>                           | Invertebrate | 1994 | -5  | 0.37 | \$182,419    | 68 |
| <i>Schiedea nuttallii</i>                       | Plant        | 1999 | -4  | 0.36 | \$135,600    | 69 |
| <i>Dudleya cymosa ovatifolia</i>                | Plant        | 1999 | -4  | 0.36 | \$62,440     | 70 |
| <i>Eriogonum ovalifolium<br/>williamsiae</i>    | Plant        | 1995 | -7  | 0.36 | \$57,400     | 71 |
| <i>Erimystax cahni</i>                          | Fish         | 1983 | -8  | 0.36 | \$34,710     | 72 |
| <i>Ambystoma macrodactylum<br/>croceum</i>      | Amphibian    | 1999 | -7  | 0.35 | \$480,347    | 73 |
| <i>Silene polypetala</i>                        | Plant        | 1996 | -5  | 0.35 | \$29,107     | 74 |
| <i>Pleurobema clava</i>                         | Invertebrate | 1994 | -5  | 0.34 | \$473,617    | 75 |

|                                          |              |      |     |      |             |    |
|------------------------------------------|--------------|------|-----|------|-------------|----|
| <i>Brighamia insignis</i>                | Plant        | 1995 | -6  | 0.34 | \$66,531    | 76 |
| <i>Medionidus parvulus</i>               | Invertebrate | 2000 | -6  | 0.34 | \$52,466    | 77 |
| <i>Drymarchon corais couperi</i>         | Reptile      | 2009 | -6  | 0.33 | \$1,830,434 | 78 |
| <i>Speyeria zerene hippolyta</i>         | Invertebrate | 2001 | -5  | 0.33 | \$1,023,000 | 79 |
| <i>Percina pantherina</i>                | Fish         | 1993 | -4  | 0.33 | \$206,724   | 80 |
| <i>Astragalus brauntonii</i>             | Plant        | 1999 | -4  | 0.33 | \$62,440    | 81 |
| <i>Pentachaeta lyonii</i>                | Plant        | 1999 | -5  | 0.33 | \$62,440    | 82 |
| <i>Epioblasma metastriata</i>            | Invertebrate | 2000 | -4  | 0.33 | \$52,466    | 83 |
| <i>Lampsilis higginsii</i>               | Invertebrate | 2004 | -7  | 0.32 | \$1,558,000 | 84 |
| <i>Amsinckia grandiflora</i>             | Plant        | 1997 | -8  | 0.32 | \$139,744   | 85 |
| <i>Sanicula purpurea</i>                 | Plant        | 1999 | -4  | 0.32 | \$135,600   | 86 |
| <i>Epicrates inornatus</i>               | Reptile      | 1986 | -4  | 0.3  | \$142,000   | 87 |
| <i>Argemone pleiacantha pinnatisecta</i> | Plant        | 1994 | -5  | 0.3  | \$77,087    | 88 |
| <i>Pityopsis ruthii</i>                  | Plant        | 1992 | -4  | 0.3  | \$53,950    | 89 |
| <i>Pleurobema georgianum</i>             | Invertebrate | 2000 | -4  | 0.3  | \$52,466    | 90 |
| <i>Potentilla hickmanii</i>              | Plant        | 2004 | -6  | 0.3  | \$33,723    | 91 |
| <i>Isoetes tegetiformans</i>             | Plant        | 1993 | -4  | 0.3  | \$8,944     | 92 |
| <i>Epioblasma brevidens</i>              | Invertebrate | 2004 | -5  | 0.29 | \$185,755   | 93 |
| <i>Spiranthes parksii</i>                | Plant        | 1984 | -9  | 0.29 | \$109,013   | 94 |
| <i>Pteropus mariannus mariannus</i>      | Mammal       | 1990 | -10 | 0.28 | \$535,653   | 95 |

|                                        |              |      |     |      |             |     |
|----------------------------------------|--------------|------|-----|------|-------------|-----|
| <i>Clarkia speciosa immaculata</i>     | Plant        | 1998 | -6  | 0.28 | \$46,065    | 96  |
| <i>Villosa perpurpurea</i>             | Invertebrate | 2004 | -7  | 0.27 | \$185,755   | 97  |
| <i>Astragalus applegatei</i>           | Plant        | 1998 | -5  | 0.27 | \$149,490   | 98  |
| <i>Bufo houstonensis</i>               | Amphibian    | 1984 | -6  | 0.26 | \$479,360   | 99  |
| <i>Helianthus schweinitzii</i>         | Plant        | 1994 | -5  | 0.26 | \$183,167   | 100 |
| <i>Sclerocactus wrightiae</i>          | Plant        | 1985 | -4  | 0.26 | \$93,672    | 101 |
| <i>Epioblasma othcaloogensis</i>       | Invertebrate | 2000 | -4  | 0.26 | \$52,466    | 102 |
| <i>Pleurobema furvum</i>               | Invertebrate | 2000 | -5  | 0.25 | \$52,466    | 103 |
| <i>Oxypolis canbyi</i>                 | Plant        | 1990 | -4  | 0.24 | \$154,563   | 104 |
| <i>Schiedea adamantis</i>              | Plant        | 1994 | -4  | 0.24 | \$33,537    | 105 |
| <i>Gambelia silus</i>                  | Reptile      | 1998 | -10 | 0.23 | \$1,303,380 | 106 |
| <i>Ictalurus pricei</i>                | Fish         | 1995 | -5  | 0.23 | \$136,476   | 107 |
| <i>Clermontia drepanomorpha</i>        | Plant        | 1996 | -5  | 0.23 | \$33,265    | 108 |
| <i>Chasmistes liorus</i>               | Fish         | 1999 | -4  | 0.22 | \$1,707,317 | 109 |
| <i>Dipodomys heermanni morroensis</i>  | Mammal       | 2000 | -8  | 0.22 | \$579,960   | 110 |
| <i>Epioblasma torulosa rangiana</i>    | Invertebrate | 1994 | -5  | 0.22 | \$473,617   | 111 |
| <i>Epioblasma obliquata perobliqua</i> | Invertebrate | 1990 | -9  | 0.22 | \$124,155   | 112 |
| <i>Etheostoma boschungii</i>           | Fish         | 1984 | -4  | 0.22 | \$82,955    | 113 |
| <i>Phyllostegia racemosa</i>           | Plant        | 1998 | -4  | 0.22 | \$77,996    | 114 |
| <i>Somatochlora hineana</i>            | Invertebrate | 2001 | -4  | 0.21 | \$868,758   | 115 |



|                                            |              |      |    |      |              |     |
|--------------------------------------------|--------------|------|----|------|--------------|-----|
| <i>Asclepias meadii</i>                    | Plant        | 2003 | -6 | 0.21 | \$251,037    | 116 |
| <i>Arctostaphylos pallida</i>              | Plant        | 2014 | -4 | 0.21 | \$41,704     | 117 |
| <i>Scaphirhynchus albus</i>                | Fish         | 2013 | -5 | 0.2  | \$51,034,680 | 118 |
| <i>Myotis sodalis</i>                      | Mammal       | 2007 | -7 | 0.2  | \$16,655,800 | 119 |
| <i>Ammodramus savannarum floridanus</i>    | Bird         | 1989 | -7 | 0.2  | \$5,627,059  | 120 |
| <i>Dipodomys nitratooides nitratooides</i> | Mammal       | 1998 | -8 | 0.2  | \$1,303,380  | 121 |
| <i>Quadrula cylindrica strigillata</i>     | Invertebrate | 2004 | -4 | 0.2  | \$185,755    | 122 |
| <i>Plantago hawaiiensis</i>                | Plant        | 1996 | -4 | 0.2  | \$33,265     | 123 |
| <i>Tamiasciurus hudsonicus grahamensis</i> | Mammal       | 2011 | -6 | 0.19 | \$612,990    | 124 |
| <i>Cyprogenia stegaria</i>                 | Invertebrate | 2008 | -7 | 0.19 | \$572,400    | 125 |
| <i>Cyprinella formosa</i>                  | Fish         | 1995 | -4 | 0.19 | \$136,476    | 126 |
| <i>Lupinus aridorum</i>                    | Plant        | 1996 | -8 | 0.19 | \$83,599     | 127 |
| <i>Astragalus osterhoutii</i>              | Plant        | 1992 | -4 | 0.19 | \$35,828     | 128 |
| <i>Pleurobema taitianum</i>                | Invertebrate | 1989 | -7 | 0.18 | \$84,788     | 129 |
| <i>Coryphantha robbinsorum</i>             | Plant        | 1993 | -5 | 0.18 | \$44,436     | 130 |
| <i>Isodendrion laurifolium</i>             | Plant        | 1999 | -5 | 0.17 | \$135,600    | 131 |
| <i>Melicope knudsenii</i>                  | Plant        | 1995 | -4 | 0.17 | \$66,531     | 132 |
| <i>Vicia menziesii</i>                     | Plant        | 1984 | -4 | 0.17 | \$48,533     | 133 |
| <i>Euphilotes enoptes smithi</i>           | Invertebrate | 1984 | -5 | 0.16 | \$243,413    | 134 |

|                                             |              |      |     |      |             |     |
|---------------------------------------------|--------------|------|-----|------|-------------|-----|
| <i>Dipodomys ingens</i>                     | Mammal       | 1998 | -8  | 0.15 | \$1,303,380 | 135 |
| <i>Torreya taxifolia</i>                    | Plant        | 1986 | -10 | 0.15 | \$122,830   | 136 |
| <i>Nolina brittoniana</i>                   | Plant        | 1996 | -5  | 0.15 | \$83,599    | 137 |
| <i>Euphorbia haeleeleana</i>                | Plant        | 1999 | -5  | 0.14 | \$135,600   | 138 |
| <i>Lasmigona decorata</i>                   | Invertebrate | 2009 | -7  | 0.13 | \$1,445,340 | 139 |
| <i>Arkansia wheeleri</i>                    | Invertebrate | 2004 | -10 | 0.13 | \$507,053   | 140 |
| <i>Acrocephalus luscini</i>                 | Bird         | 1998 | -5  | 0.13 | \$395,633   | 141 |
| <i>Pteralyxia kauaiensis</i>                | Plant        | 1995 | -4  | 0.13 | \$66,531    | 142 |
| <i>Panicum fauriei carteri</i>              | Plant        | 1993 | -5  | 0.13 | \$43,639    | 143 |
| <i>Dicerandra cornutissima</i>              | Plant        | 1987 | -6  | 0.13 | \$7,858     | 144 |
| <i>Rostrhamus sociabilis plumbeus</i>       | Bird         | 1989 | -4  | 0.12 | \$5,627,059 | 145 |
| <i>Dalea foliosa</i>                        | Plant        | 1996 | -5  | 0.12 | \$281,940   | 146 |
| <i>Isodendrion longifolium</i>              | Plant        | 1999 | -5  | 0.12 | \$135,600   | 147 |
| <i>Hibiscus arnottianus<br/>immaculatus</i> | Plant        | 1996 | -5  | 0.12 | \$114,626   | 148 |
| <i>Cyrtandra crenata</i>                    | Plant        | 1998 | -5  | 0.12 | \$48,051    | 149 |
| <i>Dicerandra immaculata</i>                | Plant        | 1989 | -7  | 0.11 | \$5,627,059 | 150 |
| <i>Reithrodontomys raviventris</i>          | Mammal       | 2014 | -4  | 0.11 | \$5,183,564 | 151 |
| <i>Pyrgulopsis bruneauensis</i>             | Invertebrate | 2002 | -6  | 0.11 | \$967,500   | 152 |
| <i>Stygoparnus comalensis</i>               | Invertebrate | 1996 | -4  | 0.11 | \$200,152   | 153 |
| <i>Cyanea grimesiana grimesiana</i>         | Plant        | 1999 | -4  | 0.11 | \$135,600   | 154 |

|                                      |              |      |    |      |             |     |
|--------------------------------------|--------------|------|----|------|-------------|-----|
| <i>Geum radiatum</i>                 | Plant        | 1993 | -5 | 0.11 | \$101,430   | 155 |
| <i>Epioblasma penita</i>             | Invertebrate | 1989 | -5 | 0.11 | \$84,788    | 156 |
| <i>Spigelia gentianoides</i>         | Plant        | 2012 | -7 | 0.11 | \$75,705    | 157 |
| <i>Silene perlmanii</i>              | Plant        | 1998 | -5 | 0.11 | \$48,051    | 158 |
| <i>Rallus longirostris obsoletus</i> | Bird         | 2014 | -6 | 0.1  | \$5,183,564 | 159 |
| <i>Corvus hawaiiensis</i>            | Bird         | 2009 | -8 | 0.1  | \$3,134,840 | 160 |
| <i>Adenophorus perians</i>           | Plant        | 1999 | -4 | 0.1  | \$135,600   | 161 |
| <i>Castilleja mollis</i>             | Plant        | 2000 | -4 | 0.1  | \$134,792   | 162 |
| <i>Hibiscadelphus hualalaiensis</i>  | Plant        | 1998 | -4 | 0.1  | \$77,996    | 163 |
| <i>Daphnopsis hellerana</i>          | Plant        | 1992 | -5 | 0.1  | \$49,247    | 164 |
| <i>Caesalpinia kavaiense</i>         | Plant        | 1994 | -8 | 0.09 | \$286,000   | 165 |
| <i>Nesogenes rotensis</i>            | Plant        | 2007 | -4 | 0.09 | \$255,211   | 166 |
| <i>Hibiscadelphus giffardianus</i>   | Plant        | 1998 | -5 | 0.09 | \$77,996    | 167 |
| <i>Lipochaeta waimeaensis</i>        | Plant        | 1995 | -4 | 0.09 | \$66,531    | 168 |
| <i>Kokia drynarioides</i>            | Plant        | 1994 | -4 | 0.08 | \$286,000   | 169 |
| <i>Berberis pinnata insularis</i>    | Plant        | 2000 | -6 | 0.08 | \$134,792   | 170 |
| <i>Succinea chittenangoensis</i>     | Invertebrate | 2006 | -5 | 0.08 | \$87,193    | 171 |
| <i>Sicyos alba</i>                   | Plant        | 1998 | -5 | 0.08 | \$77,996    | 172 |
| <i>Poa mannii</i>                    | Plant        | 1995 | -6 | 0.08 | \$66,531    | 173 |
| <i>Remya kauaiensis</i>              | Plant        | 1995 | -4 | 0.08 | \$66,531    | 174 |

|                                     |              |      |    |      |             |     |
|-------------------------------------|--------------|------|----|------|-------------|-----|
| <i>Cyanea pinnatifida</i>           | Plant        | 1998 | -4 | 0.08 | \$48,051    | 175 |
| <i>Cyanea copelandii copelandii</i> | Plant        | 1996 | -4 | 0.08 | \$33,265    | 176 |
| <i>Notropis girardi</i>             | Fish         | 2009 | -5 | 0.07 | \$1,324,786 | 177 |
| <i>Pacifastacus fortis</i>          | Invertebrate | 1998 | -8 | 0.07 | \$1,287,000 | 178 |
| <i>Phacelia insularis insularis</i> | Plant        | 2000 | -4 | 0.07 | \$134,792   | 179 |
| <i>Thysanocarpus conchuliferus</i>  | Plant        | 2000 | -5 | 0.07 | \$134,792   | 180 |
| <i>Pleurobema gibberum</i>          | Invertebrate | 1992 | -4 | 0.07 | \$93,337    | 181 |
| <i>Phyllostegia warshaueri</i>      | Plant        | 1998 | -4 | 0.07 | \$77,996    | 182 |

---

**Table S3.** “Overfunded” species that would be triaged (allocated budget reduced to proposed budget and proportional spending set to 1) rank ordered by the ratio of allocated to proposed budget (proportion spending).

| Scientific name                      | Taxon        | Year | Status | Proportion budget received | Allocated budget | Figure 2 (red) |
|--------------------------------------|--------------|------|--------|----------------------------|------------------|----------------|
| <i>Cyanea koolauensis</i>            | Plant        | 1998 | -5     | 1.03                       | \$48,051         | 1              |
| <i>Medionidus acutissimus</i>        | Invertebrate | 2000 | -5     | 1.06                       | \$52,466         | 2              |
| <i>Isoetes melanospora</i>           | Plant        | 1993 | -4     | 1.52                       | \$8,944          | 3              |
| <i>Astragalus albens</i>             | Plant        | 1997 | -6     | 1.24                       | \$22,620         | 4              |
| <i>Chorizanthe robusta</i>           | Plant        | 1998 | -4     | 1.23                       | \$33,348         | 5              |
| <i>Baptisia arachnifera</i>          | Plant        | 1984 | -9     | 1.82                       | \$12,320         | 6              |
| <i>Coryphantha sneedii sneedii</i>   | Plant        | 1986 | -4     | 1.56                       | \$20,058         | 7              |
| <i>Oxytheca parishii goodmaniana</i> | Plant        | 1997 | -6     | 1.51                       | \$22,620         | 8              |
| <i>Nerodia clarkii taeniata</i>      | Reptile      | 1993 | -5     | 1.24                       | \$48,944         | 9              |
| <i>Erigeron parishii</i>             | Plant        | 1997 | -7     | 1.52                       | \$22,620         | 10             |
| <i>Lesquerella kingii bernardina</i> | Plant        | 1997 | -6     | 1.53                       | \$22,620         | 11             |
| <i>Eriogonum ovalifolium vineum</i>  | Plant        | 1997 | -6     | 1.56                       | \$22,620         | 12             |
| <i>Physa natricina</i>               | Invertebrate | 1995 | -4     | 1.18                       | \$71,176         | 13             |
| <i>Erysimum menziesii</i>            | Plant        | 1998 | -4     | 1.76                       | \$32,204         | 14             |
| <i>Tetramolopium arenarium</i>       | Plant        | 1996 | -5     | 1.87                       | \$33,265         | 15             |
| <i>Portulaca sclerocarpa</i>         | Plant        | 1996 | -4     | 2.03                       | \$33,265         | 16             |

|                                           |              |      |     |      |           |    |
|-------------------------------------------|--------------|------|-----|------|-----------|----|
| <i>Plagopterus argentissimus</i>          | Fish         | 1995 | -8  | 1.12 | \$293,250 | 17 |
| <i>Peromyscus polionotus niveiventris</i> | Mammal       | 1993 | -4  | 4.17 | \$11,896  | 18 |
| <i>Cicindela dorsalis dorsalis</i>        | Invertebrate | 1994 | -5  | 1.33 | \$116,703 | 19 |
| <i>Echinacea laevigata</i>                | Plant        | 1995 | -5  | 1.3  | \$140,000 | 20 |
| <i>Helonias bullata</i>                   | Plant        | 1991 | -4  | 1.6  | \$78,831  | 21 |
| <i>Lepidomeda vittata</i>                 | Fish         | 1998 | -8  | 1.14 | \$382,128 | 22 |
| <i>Arctomecon humilis</i>                 | Plant        | 1985 | -10 | 2.68 | \$32,550  | 23 |
| <i>Zizania texana</i>                     | Plant        | 1996 | -8  | 2.04 | \$60,241  | 24 |
| <i>Gasterosteus aculeatus williamsoni</i> | Fish         | 1985 | -5  | 1.29 | \$217,723 | 25 |
| <i>Etheostoma fonticola</i>               | Fish         | 1996 | -5  | 2.06 | \$60,241  | 26 |
| <i>Amaranthus pumilus</i>                 | Plant        | 1996 | -6  | 1.49 | \$162,800 | 27 |
| <i>Orcuttia californica</i>               | Plant        | 1998 | -5  | 3.92 | \$39,382  | 28 |
| <i>Alasmidonta heterodon</i>              | Invertebrate | 1993 | -4  | 1.76 | \$156,331 | 29 |
| <i>Uma inornata</i>                       | Reptile      | 1985 | -11 | 1.68 | \$180,833 | 30 |
| <i>Pogogyne abramsii</i>                  | Plant        | 1998 | -5  | 4.3  | \$39,382  | 31 |
| <i>Lindera melissifolia</i>               | Plant        | 1993 | -6  | 1.99 | \$142,646 | 32 |
| <i>Tiaroga cobitis</i>                    | Fish         | 1991 | -9  | 1.88 | \$196,650 | 33 |
| <i>Pogogyne nudiuscula</i>                | Plant        | 1998 | -5  | 5.47 | \$39,382  | 34 |
| <i>Clemmys muhlenbergii</i>               | Reptile      | 2001 | -4  | 1.28 | \$702,680 | 35 |
| <i>Meda fulgida</i>                       | Fish         | 1991 | -9  | 2.12 | \$196,650 | 36 |

|                                         |              |      |     |       |             |    |
|-----------------------------------------|--------------|------|-----|-------|-------------|----|
| <i>Navarretia fossalis</i>              | Plant        | 1998 | -5  | 6.65  | \$39,382    | 37 |
| <i>Poeciliopsis occidentalis</i>        | Fish         | 1998 | -6  | 2.39  | \$160,732   | 38 |
| <i>Brachylagus idahoensis</i>           | Mammal       | 2012 | -5  | 3.5   | \$111,137   | 39 |
| <i>Puffinus auricularis newelli</i>     | Bird         | 1983 | -7  | 2.66  | \$202,020   | 40 |
| <i>Streptocephalus woottoni</i>         | Invertebrate | 1998 | -5  | 9.53  | \$39,382    | 41 |
| <i>Chasmistes brevirostris</i>          | Fish         | 2013 | -4  | 1.35  | \$1,296,930 | 42 |
| <i>Dendroica chrysoparia</i>            | Bird         | 1992 | -9  | 1.44  | \$1,315,716 | 43 |
| <i>Oncorhynchus clarki<br/>henshawi</i> | Fish         | 1995 | -6  | 1.8   | \$1,081,777 | 44 |
| <i>Gopherus polyphemus</i>              | Reptile      | 1990 | -10 | 4.74  | \$256,913   | 45 |
| <i>Branchinecta lynchi</i>              | Invertebrate | 2013 | -6  | 6.97  | \$219,688   | 46 |
| <i>Acipenser transmontanus</i>          | Fish         | 1999 | -6  | 1.65  | \$2,087,680 | 47 |
| <i>Aphelocoma coerulescens</i>          | Bird         | 1990 | -11 | 52.53 | \$33,820    | 48 |
| <i>Brachyramphus marmoratus</i>         | Bird         | 1997 | -9  | 2.13  | \$2,036,214 | 49 |
| <i>Strix occidentalis caurina</i>       | Bird         | 2011 | -10 | 1.91  | \$4,448,500 | 50 |

---
